# Supplementary material for: Discovery and heterologous production of sarubicins and quinazolinoneC-glycosides with protecting activity for cardiomyocytes
Source: Royal Society of Chemistry journal article supplement (doi:10.1039/d1qo00470k), 2021-01-01
Supplement: d1qo00470k1.pdf [file d1qo00470k1.pdf]

## Discovery and Heterologous Production of Sarubicins and Quinazolinone C-Glycosides with Protecting Activity for Cardiomyocytes

Mingming Yu,<sup>‡a,b</sup> Jianying Luo,<sup>‡a,b</sup> Dan Luo,<sup>c</sup> Qiang He,<sup>a</sup> Yijun Yan,<sup>a</sup> Xu Ji,<sup>d</sup> and Sheng-Xiong Huang<sup>\*a</sup>

<sup>a</sup> State Key Laboratory of Phytochemistry and Plant Resources in West China, and Yunnan Key Laboratory of Natural Medicinal Chemistry, Kunming Institute of Botany, Chinese Academy of Sciences, Kunming 650201, China.

<sup>b</sup> University of Chinese Academy of Sciences, Beijing 100049, China.

<sup>c</sup> College of Traditional Chinese Medicine, Yunnan University of Traditional Chinese Medicine, Kunming 650500, China.

<sup>d</sup> Key Laboratory of Medicinal Chemistry for Natural Resource of Ministry of Education, Yunnan University, Kunming 650091, China.

<sup>‡</sup> M.Y. and J.L. contributed equally to this work.

<sup>\*</sup> Corresponding Author. S.-X. Huang, Tel: +86-871-65215112. E-mail: sxhuang@mail.kib.ac.cn

## Contents

|                                                                                                                                           |    |
|-------------------------------------------------------------------------------------------------------------------------------------------|----|
| <b>Experiment Section</b> .....                                                                                                           | 2  |
| Tab. S1. Bacterial strains and plasmids used in this study .....                                                                          | 2  |
| Tab. S2. The primers used in this study.....                                                                                              | 3  |
| Tab. S3. Deduced functions of ORFs in <i>sar</i> BGC .....                                                                                | 4  |
| Tab. S4. Protective effects of compounds <b>1</b> and <b>2</b> against H <sub>2</sub> O <sub>2</sub> -induced cardiomyocytes injury ..... | 5  |
| Fig. S1. Confirmation of mutants by PCR using the primers. ....                                                                           | 5  |
| Fig. S2. Two possible routes of C-glycosylation in the biosynthesis of sarubicin A .....                                                  | 6  |
| Scheme S1. A) Transformation of <b>1</b> to <b>2</b> ; B) Proposed mechanism of transformation from <b>1</b> to <b>2</b> . ....           | 6  |
| Tab. S5. 1D and 2D NMR data of compound <b>3</b> (H9101) .....                                                                            | 7  |
| Tab. S6. 1D and 2D NMR data of compound <b>4</b> (H9102) .....                                                                            | 8  |
| Tab. S7. 1D and 2D NMR data of compound <b>5</b> (H9103) .....                                                                            | 9  |
| <b>NMR and HRESIMS spectra of compounds 3-5 and 8-10</b> .....                                                                            | 10 |
| Fig. S3. HRESIMS spectrum of <b>3</b> .....                                                                                               | 10 |
| Fig. S4. <sup>1</sup> H NMR (600 MHz) spectrum of <b>3</b> in DMSO- <i>d</i> <sub>6</sub> .....                                           | 11 |
| Fig. S5. <sup>13</sup> C NMR (150 MHz) spectrum of <b>3</b> in DMSO- <i>d</i> <sub>6</sub> .....                                          | 12 |
| Fig. S6. HSQC (600 MHz) spectrum of <b>3</b> in DMSO- <i>d</i> <sub>6</sub> .....                                                         | 13 |
| Fig. S7. HMBC (600 MHz) spectrum of <b>3</b> in DMSO- <i>d</i> <sub>6</sub> .....                                                         | 14 |
| Fig. S8. ROESY (600 MHz) spectrum of <b>3</b> in DMSO- <i>d</i> <sub>6</sub> .....                                                        | 15 |
| Fig. S9. HRESIMS spectrum of <b>4</b> .....                                                                                               | 16 |
| Fig. S10. <sup>1</sup> H NMR (600 MHz) spectrum of <b>4</b> in DMSO- <i>d</i> <sub>6</sub> .....                                          | 17 |
| Fig. S11. <sup>13</sup> C NMR (150 MHz) spectrum of <b>4</b> in DMSO- <i>d</i> <sub>6</sub> .....                                         | 18 |
| Fig. S12. HSQC (600 MHz) spectrum of <b>4</b> in DMSO- <i>d</i> <sub>6</sub> .....                                                        | 19 |
| Fig. S13. HMBC (600 MHz) spectrum of <b>4</b> in DMSO- <i>d</i> <sub>6</sub> .....                                                        | 20 |
| Fig. S14. ROESY (600 MHz) spectrum of <b>4</b> in DMSO- <i>d</i> <sub>6</sub> .....                                                       | 21 |
| Fig. S15. HRESIMS spectrum of <b>5</b> .....                                                                                              | 22 |
| Fig. S16. <sup>1</sup> H NMR (600 MHz) spectrum of <b>5</b> in DMSO- <i>d</i> <sub>6</sub> .....                                          | 23 |
| Fig. S17. <sup>13</sup> C NMR (150 MHz) spectrum of <b>5</b> in DMSO- <i>d</i> <sub>6</sub> .....                                         | 24 |
| Fig. S18. HSQC (600 MHz) spectrum of <b>5</b> in DMSO- <i>d</i> <sub>6</sub> .....                                                        | 25 |
| Fig. S19. HMBC (600 MHz) spectrum of <b>5</b> in DMSO- <i>d</i> <sub>6</sub> .....                                                        | 26 |
| Fig. S20. ROESY (600 MHz) spectrum of <b>5</b> in DMSO- <i>d</i> <sub>6</sub> .....                                                       | 27 |
| Fig. S21. <sup>1</sup> H NMR (600 MHz) spectrum of <b>8</b> in DMSO- <i>d</i> <sub>6</sub> .....                                          | 28 |
| Fig. S22. <sup>13</sup> C NMR (150 MHz) spectrum of <b>8</b> in DMSO- <i>d</i> <sub>6</sub> .....                                         | 29 |
| Fig. S23. <sup>1</sup> H NMR (400 MHz) spectrum of <b>9</b> in DMSO- <i>d</i> <sub>6</sub> .....                                          | 30 |
| Fig. S24. <sup>1</sup> H NMR (100 MHz) spectrum of <b>9</b> in DMSO- <i>d</i> <sub>6</sub> .....                                          | 31 |
| Fig. S25. <sup>1</sup> H NMR (400 MHz) spectrum of <b>10</b> in DMSO- <i>d</i> <sub>6</sub> .....                                         | 32 |
| Fig. S26. <sup>1</sup> H NMR (100 MHz) spectrum of <b>10</b> in DMSO- <i>d</i> <sub>6</sub> .....                                         | 33 |
| <b>Supplementary references</b> .....                                                                                                     | 34 |

## Experiment Section

Tab. S1. Bacterial strains and plasmids used in this study

| Strain and plasmid                              | Description                                                                                                           | References or sources            |
|-------------------------------------------------|-----------------------------------------------------------------------------------------------------------------------|----------------------------------|
| <b><i>E. coli</i></b>                           |                                                                                                                       |                                  |
| DH5 $\alpha$                                    | Host strain for cloning                                                                                               | Invitrogen                       |
| BW25113/pIJ790                                  | Host strain for PCR-targeting                                                                                         | Ref. 1                           |
| ET12567/pUZ8002                                 | Host strain for conjugation between <i>E. coli</i> and <i>Streptomyces</i>                                            | Ref. 2                           |
| <b><i>Streptomyces</i></b>                      |                                                                                                                       |                                  |
| XL1-blueMR                                      | Host strain for genomic library                                                                                       | Agilent Technologies             |
| DH5 $\alpha$ /BT340                             | Host strain for in-frame deletion                                                                                     | Ref. 3                           |
| <b><i>Streptomyces</i></b>                      |                                                                                                                       |                                  |
| <i>S. sp.</i> KIB-H91                           | Wild type sarubicins producing strain                                                                                 | This study                       |
| <i>S. coelicolor</i> M1154                      | Host strain for heterologous expression                                                                               | Ref. 4                           |
| <i>S. coelicolor</i> M1154/p18F3                | <i>Streptomyces coelicolor</i> M1154 integrated with plasmid 18F3 which contains <i>sar</i> biosynthetic gene cluster | This study                       |
| <i>S. coelicolor</i> 18F3 $\Delta$ <i>sarS3</i> | <i>sarS3</i> inactivation mutant of <i>S. coelicolor</i> 18F3                                                         | This study                       |
| <i>S. coelicolor</i> 18F3 $\Delta$ <i>sarS5</i> | <i>sarS5</i> inactivation mutant of <i>S. coelicolor</i> 18F3                                                         | This study                       |
| <i>S. coelicolor</i> 18F3 $\Delta$ <i>sarO</i>  | <i>sarO</i> inactivation mutant of <i>S. coelicolor</i> 18F3                                                          | This study                       |
| <b>Cosmid</b>                                   |                                                                                                                       |                                  |
| pJTU2554                                        | Apr <sup>r</sup> , Cosmid vector for genomic library construction                                                     | Ref. 1                           |
| pJTU6722                                        | Ery <sup>r</sup> , Vector for PCR targeting                                                                           | Constructed by Prof. Meifeng Tao |
| p18F3                                           | Apr <sup>r</sup> , Cosmid which contains <i>sar</i> biosynthetic gene cluster                                         | This study                       |
| p18F3_ $\Delta$ <i>sarS3</i>                    | Apr <sup>r</sup> , gene inactivation clone used for <i>sarS3</i> mutant                                               | This study                       |
| p18F3_ $\Delta$ <i>sarS5</i>                    | Apr <sup>r</sup> , gene inactivation clone used for <i>sarS5</i> mutant                                               | This study                       |
| p18F3_ $\Delta$ <i>sarO</i>                     | Apr <sup>r</sup> , gene inactivation clone used for <i>sarO</i> mutant                                                | This study                       |

Tab. S2. The primers used in this study

| gene                         | Sequence (5' to 3')                                                                                                                            |
|------------------------------|------------------------------------------------------------------------------------------------------------------------------------------------|
| <b>For gene Screening</b>    |                                                                                                                                                |
| <i>gra-Orf14</i>             | 14F: GCTGGAGCACATCGCGTTCA<br>14R: CACGAGCTTGGGCATGTTGG                                                                                         |
| <i>gra-Orf17</i>             | 17F: TCGTGGTGAAGAGCGGGATC<br>17R: GCGGCTGACCTTGGTGAAA                                                                                          |
| <b>For gene disruption</b>   |                                                                                                                                                |
| <i>sarS3</i>                 | 5152F: GCCACGCGCCGACGGAACGCGGGGCACCAGGTCTTCATGattccggggatcc<br>gtcgac<br>5152R: TCTCGCAGGCGCCACCACGGCGTCCTGCGAGTCCCTCCttaggctggag<br>ctgcttc   |
| <i>sarS5</i>                 | 5158F: CGCCACCGTGGAAGTGGACGCCGTGTACGTCCCGTGCCattccggggatcc<br>gtcgac<br>5158R: CGGGTGAACGCCCGGTCCACCCGGACCGTGCCGTGTGCCcttaggctggag<br>ctgcttc  |
| <i>sarO</i>                  | 5154F: TTGGAGACCCAGAACCTCATGGTCAAGACAGGCATCTCGattccggggatcc<br>gtcgac<br>5154R: CTCAGGTGCCCGGCCGGGCTCCGCCGTTTGTATCCCGCGCttaggctggag<br>ctgcttc |
| <b>For gene confirmation</b> |                                                                                                                                                |
| <i>sarS3</i>                 | 5152YF: GAAGTTCCTGGGTATTCC<br>5152YR: CGCCCCGGCCAGCGCTTCG                                                                                      |
| <i>sarS5</i>                 | 5158YF: CGCCGATGCTGCCGGCC<br>5158YR: GGTGCGCACGGCCGTAC                                                                                         |
| <i>sarO</i>                  | 5154YF: CCGTCGGAAGGTATTGAC<br>5154YR: CATGTACGTGATAGCCAAC                                                                                      |

Tab. S3. Deduced functions of ORFs in *sar* BGC

| Gene NO.     | Size aa | Proposed function by a BLAST search (blastp)<br>Protein, Origin                                     | Positives/<br>Identities | Accession<br>No. |
|--------------|---------|-----------------------------------------------------------------------------------------------------|--------------------------|------------------|
| <i>sarN</i>  | 610     | ATP-dependent amidotransferase, TtmN [ <i>Streptomyces afghaniensis</i> ]                           | 66/55                    | ALJ49932.1       |
| <i>sarR1</i> | 391     | MFS transporter, partial, <i>Streptomyces acidiscabies</i>                                          | 74/62                    | WP_040837276.1   |
| <i>sarA1</i> | 390     | DHAP synthase, PhzC [ <i>Streptomyces tendae</i> ]                                                  | 72/62                    | WP_028424979.1   |
| <i>sarA2</i> | 269     | 2,3-dihydro-2,3-dihydroxybenzoate dehydrogenase<br>DhbX [ <i>Klebsiella oxytoca</i> ]               | 61/46                    | AFS18549.1       |
| <i>sarA3</i> | 228     | Isochorismatase, PhzD [ <i>Streptomyces tendae</i> ]                                                | 71/64                    | AFS18573.1       |
| <i>sarA4</i> | 623     | 2-Amino-2-desoxyisochorismate Synthase PhzE<br>[ <i>Streptomyces tendae</i> ]                       | 73/62                    | AFS18572.1       |
| <i>sarU1</i> | 116     | hypothetical protein, <i>Streptomyces gancidicus</i> BKS 13-15                                      | 74/63                    | WP_006135773.1   |
| <i>sarH</i>  | 396     | 3-hydroxybenzoate-6-hydroxylase,3HB6H [ <i>Rhodococcus jostii</i> ]                                 | 46/33                    | WP_011594786.1   |
| <i>sarS1</i> | 323     | dTDP-glucose 4,6 dehydratase, StrE [ <i>Streptomyces griseus</i> ]                                  | 72/66                    | WP_030951601.1   |
| <i>sarS2</i> | 329     | dTDP-1-glucose thymidyltransferase, StrD [ <i>Streptomyces griseus</i> ]                            | 69/61                    | CAH94331.1       |
| <i>sarS3</i> | 344     | C-glycosyltransferase,UrdGT2 [ <i>Streptomyces fradiae</i> ]                                        | 61/52                    | AAF00209.1       |
| <i>sarR2</i> | 200     | SARP family transcriptional regulator, SrrZ [ <i>Streptomyces sp.</i> F-3]                          | 61/48                    | WP_003951745.1   |
| <i>sarO</i>  | 311     | Dehydrogenase, <i>Nocardia sp.</i> BMG51109                                                         | 71/57                    | WP_036571061.1   |
| <i>sarU2</i> | 101     | Hypothetical protein, <i>Amycolatopsis sp.</i> MJM2582                                              | 61/43                    | WP_037347854.1   |
| <i>sarR3</i> | 492     | Arabinose ABC transporter permease, <i>Bacillus megaterium</i>                                      | 78/59                    | WP_034679354.1   |
| <i>sarS4</i> | 434     | Putative NDP-deoxyglucose-2,3-dehydratase, SpnO<br>[ <i>Saccharopolyspora spinosa</i> ]             | 60/47                    | AAG23276.1       |
| <i>sarS5</i> | 326     | dTDP-3,4-diketo-2,6-dideoxy-D-glucose 3-ketoreductase,<br>SpnN [ <i>Saccharopolyspora spinosa</i> ] | 61/49                    | AAG23275.1       |
| <i>sarR4</i> | 151     | MerR family transcriptional regulator, <i>Microbispora sp.</i><br>ATCC PTA-5024                     | 80/67                    | WP_036330534.1   |
| <i>sarR5</i> | 384     | Transposase, <i>Streptomyces himastatinicus</i>                                                     | 61/51                    | WP_039941984.1   |
| <i>sarR6</i> | 652     | Transcriptional regulator, <i>Streptomyces sp.</i> NRRL F-5065                                      | 62/49                    | WP_037858633.1   |

Tab. S4. Protective effects of compounds **1** and **2** against H<sub>2</sub>O<sub>2</sub>-induced cardiomyocytes injury

| Compound                | Concentration <sup>a</sup> |              |
|-------------------------|----------------------------|--------------|
|                         | 0 μM                       | 10 μM        |
| <b>1</b>                | 49.03±3.89                 | 81.36±4.84** |
| <b>2</b>                | 49.03±3.89                 | 89.43±2.58** |
| Carvedilol <sup>b</sup> | 49.03±3.89                 | 85.98±6.18** |

Data expressed as means ±SD (n = 3). \*\*p<0.01 vs 0 μM group. <sup>b</sup> Positive control.

Fig. S1. Confirmation of mutants by PCR using the primers.

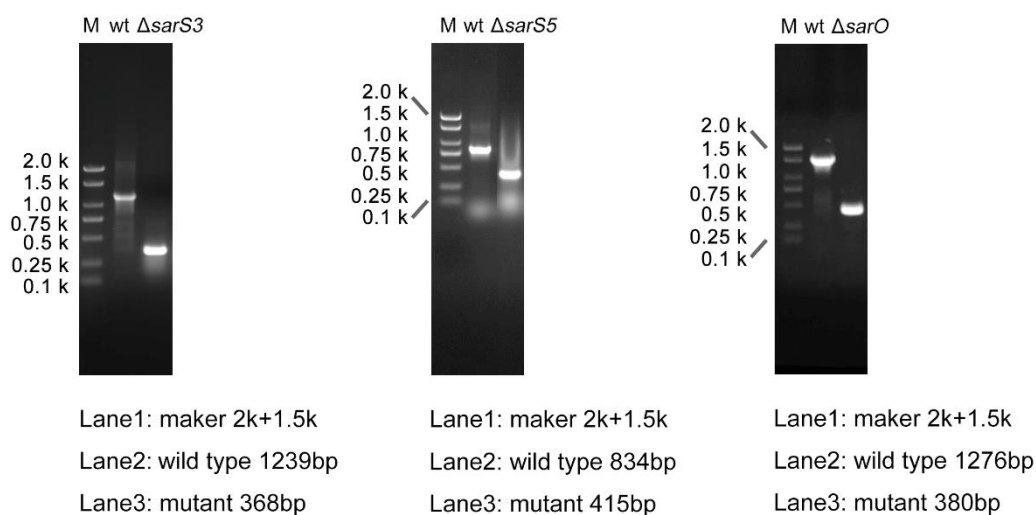

Confirmation of mutants *S. coelicolor* p18F3 *ΔsarS3*, p18F3 *ΔsarS5*, and p18F3 *ΔsarO* by PCR using the primers listed in supplementary Tab.S2.

Fig. S2. Two possible routes of C-glycosylation in the biosynthesis of sarubicin A

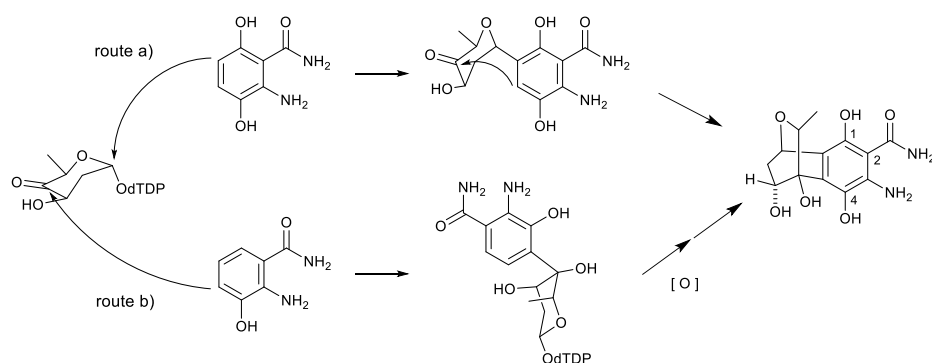

Route a): glycosyl transfer at C-6 of hydroquinone; then intramolecular aldol condensation between C-5 and C-4'.

Route b): intermolecular aldol condensation between C-5 and C-4'; followed by hydroxylation at C-1 of 3HAA; then cyclization between C-6 and C-1'.

Scheme S1. A) Transformation of **1** to **2**; B) Proposed mechanism of transformation from **1** to **2**.

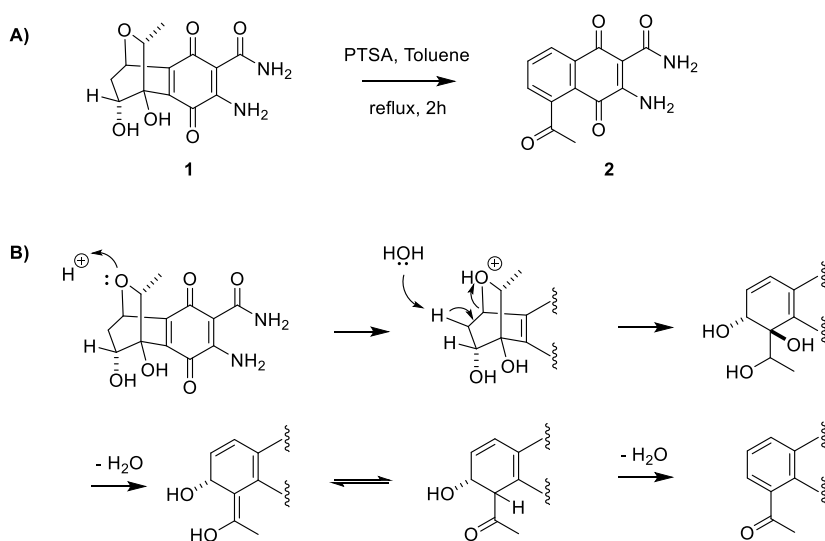

Tab. S5. 1D and 2D NMR data of compound **3** (H9101)

| H9101                   |                   |                                          |                   |                          |
|-------------------------|-------------------|------------------------------------------|-------------------|--------------------------|
| Position                | C Signals         | H Signals                                | HMBC Correlations | ROESY Correlations       |
|                         | $\delta_C$ , type | $\delta_H$ , (int. mult. <i>J</i> in Hz) |                   |                          |
| 2                       | 152.9 (s)         |                                          |                   |                          |
| 2-Me                    | 21.5 (q)          | 2.36 (3H, s)                             | 2                 |                          |
| 4                       | 167.3 (s)         |                                          |                   |                          |
| 4a                      | 102.6 (s)         |                                          |                   |                          |
| 5                       | 147.1 (s)         |                                          |                   |                          |
| 6                       | 124.3 (s)         |                                          |                   |                          |
| 7                       | 117.9 (d)         | 7.18 (1H, s)                             | 1', 5, 6, 8, 8a   | 2'-H <sub>aiX</sub>      |
| 8                       | 143.4 (s)         |                                          |                   |                          |
| 8a                      | 135.5 (s)         |                                          |                   |                          |
| 1'                      | 70.2 (d)          | 4.68 (1H, d, 11.4)                       | 5', 5, 6, 7       | 5', 3'                   |
| 2'-aix                  |                   | 1.31 (1H, pseudo-q, 12.6)                | 1', 3', 7'        | 4', 7                    |
| 2'-eq                   | 40.5 (t)          | 2.09 (1H, dd, 12.6, 3.0)                 | 3', 4'            |                          |
| 3'                      | 71.8 (d)          | 3.48 (1H, overlapped)                    |                   | 1'                       |
| 4'                      | 77.2 (d)          | 2.85 (1H, t, 9.0)                        | 3', 5', 6'        | 2'-H <sub>aiX</sub> , 6' |
| 5'                      | 76.1 (d)          | 3.32 (1H, dq, 9.0, 6.0)                  |                   | 1'                       |
| 6'                      | 18.5 (q)          | 1.22 (3H, d, 6.0)                        | 5'                | 4'                       |
| Exchangeable<br>Protons |                   | 4.72-5.30 (2H)<br>11.58 (5-OH, s)        |                   |                          |

a) Data were recorded at 600 MHz for <sup>1</sup>H and 150 MHz for <sup>13</sup>C in DMSO-*d*<sub>6</sub> using the corresponding solvent residual signal as internal standard.



Tab. S6. 1D and 2D NMR data of compound **4** (H9102)

| H9102 <sup>a</sup> |                                |                                                       |                     |                     |
|--------------------|--------------------------------|-------------------------------------------------------|---------------------|---------------------|
| Position           | C Signals<br>$\delta_c$ , type | H Signals<br>$\delta_H$ , (int. mult. <i>J</i> in Hz) | HMBC Correlations   | ROESY Correlations  |
| 2                  | 152.1 (s)                      |                                                       |                     |                     |
| 2-CH <sub>3</sub>  | 21.4 (q)                       | 2.37 (3H, s)                                          | 2                   |                     |
| 4                  | 167.3 (s) <sup>b</sup>         |                                                       |                     |                     |
| 4a                 | 106.1 (s)                      |                                                       |                     |                     |
| 5                  | 147.0 (s)                      |                                                       |                     |                     |
| 6                  | 125.0 (s)                      |                                                       |                     |                     |
| 7                  | 118.5 (d)                      | 7.28 (1H, s)                                          | 1', 5, 6, 8, 8a     | 2'-H <sub>aix</sub> |
| 8                  | 144.1 (s)                      |                                                       |                     |                     |
| 8a                 | 135.5 (s) <sup>b</sup>         |                                                       |                     |                     |
| 1'                 | 70.4 (d)                       | 4.63 (1H, d, 11.4)                                    | 2', 3', 5', 5, 6, 7 | 5', 3'              |
| 2'-aix             | 34.7 (t)                       | 1.71 (1H, dd, 12.0, 2.4)                              | 3'                  | 7                   |
| 2'-eq              |                                | 1.56 (1H, brd, 12.0)                                  | 1', 6               |                     |
| 3'                 | 69.3 (d)                       | 3.69 (1H, brd, 11.4)                                  |                     | 1'                  |
| 4'                 | 69.9 (d)                       | 3.41 (1H, overlapped)                                 | 2', 3'              | 6'                  |
| 5'                 | 74.1 (d)                       | 3.58 (1H, q, 6.0)                                     |                     | 1'                  |
| 6'                 | 17.6 (q)                       | 1.22 (3H, d, 6.0)                                     | 4', 5'              | 4'                  |
| Exchangeable       |                                | 4.12 (1H, brs)                                        |                     |                     |
| Protons            |                                | 4.30 (1H, brs)                                        |                     |                     |
| 3-NH <sub>b</sub>  |                                | 8.93 (1H, brs)                                        |                     |                     |
| 5-OH               |                                | 11.50 (1H, s)                                         |                     |                     |
| 3-NH <sub>a</sub>  |                                | 12.48 (1H, brs)                                       |                     |                     |

a) Data were recorded at 600 MHz for <sup>1</sup>H and 150 MHz for <sup>13</sup>C in DMSO-*d*<sub>6</sub> using the corresponding solvent residual signal as internal standard; b) The signals were detected by the HMBC spectrum.

Tab. S7. 1D and 2D NMR data of compound 5 (H9103)

| H9103 <sup>a</sup>      |                                |                                                       |                   |                              |
|-------------------------|--------------------------------|-------------------------------------------------------|-------------------|------------------------------|
| Position                | C Signals<br>$\delta_c$ , type | H Signals<br>$\delta_H$ , (int. mult. <i>J</i> in Hz) | HMBC Correlations | ROESY Correlations           |
| 2                       | 152.5 (s) <sup>b</sup>         |                                                       |                   |                              |
| 2-Me                    | 21.4 (q)                       | 2.37 (3H, s)                                          | 2                 |                              |
| 4                       | 167.1 (s)                      |                                                       |                   |                              |
| 4a                      | 106.4 (s)                      |                                                       |                   |                              |
| 5                       | 147.2 (s)                      |                                                       |                   |                              |
| 6                       | 122.7 (s)                      |                                                       |                   |                              |
| 7                       | 117.8 (d)                      | 7.32 (1H, s)                                          | 1', 5, 8a         | 2'-H <sub>aiX</sub>          |
| 8                       | 144.0 (s)                      |                                                       |                   |                              |
| 8a                      | 136.3 (s) <sup>b</sup>         |                                                       |                   |                              |
| 1'                      | 70.2 (d)                       | 4.92 (1H, dd, 12.0, 1.2)                              | 5', 5, 6, 7       | 5'                           |
| 2'-aix                  | 47.0 (t)                       | 2.73 (1H, pseudo-t, 12.6)                             | 1', 3', 7'        | 4', 7                        |
| 2'-eq                   |                                | 2.56 (1H, dd, 12.6, 1.2)                              | 3'                |                              |
| 3'                      | 206.4 (s)                      |                                                       |                   |                              |
| 4'                      | 78.4 (d)                       | 3.88 (1H, d, 9.6)                                     | 3', 5', 6'        | 2'-H <sub>aiX</sub> , 6' (w) |
| 5'                      | 78.3 (d)                       | 3.58 (1H, dq, 9.6, 6.0)                               |                   | 1'                           |
| 6'                      | 19.3 (q)                       | 1.37 (3H, d, 6.0)                                     | 5'                | 4' (w)                       |
| Exchangeable<br>Protons |                                | 4.72-5.30 (2H)<br>11.56 (5-OH, s)                     |                   |                              |

a) Data were recorded at 600 MHz for <sup>1</sup>H and 150 MHz for <sup>13</sup>C in DMSO-*d*<sub>6</sub> using the corresponding solvent residual signal as internal standard; b) The signals were detected by the HMBC spectrum.

## NMR and HRESIMS spectra of compounds 3-5 and 8-10

Fig. S3. HRESIMS spectrum of **3**

### Qualitative Analysis Report

|                               |                            |                      |                       |
|-------------------------------|----------------------------|----------------------|-----------------------|
| <b>Data Filename</b>          | H9101.d                    | <b>Sample Name</b>   | H9101                 |
| <b>Sample Type</b>            | Sample                     | <b>Position</b>      | P1-A3                 |
| <b>Instrument Name</b>        | Instrument 1               | <b>User Name</b>     |                       |
| <b>Acq Method</b>             | s.m                        | <b>Acquired Time</b> | 3/11/2019 11:45:01 AM |
| <b>IRM Calibration Status</b> | Success                    | <b>DA Method</b>     | Default.m             |
| <b>Comment</b>                |                            |                      |                       |
| <b>Sample Group</b>           |                            | <b>Info.</b>         |                       |
| <b>Acquisition SW</b>         | 6200 series TOF/6500series |                      |                       |
| <b>Version</b>                | Q-TOF B.05.01(B5125.2)     |                      |                       |

#### User Spectra

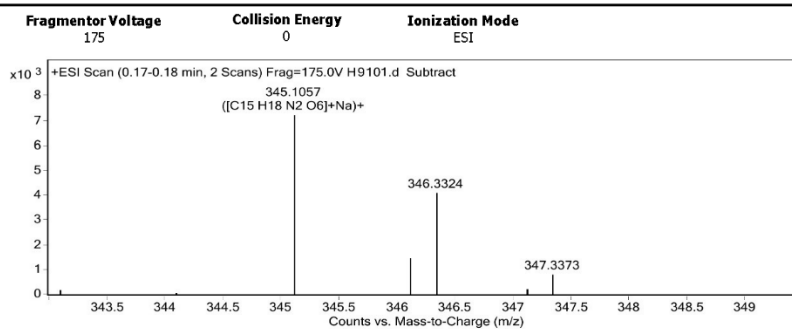

#### Peak List

| m/z      | z | Abund    | Formula       | Ion     |
|----------|---|----------|---------------|---------|
| 169.0111 | 1 | 8736.38  |               |         |
| 274.2746 | 1 | 26216.83 |               |         |
| 302.3058 | 1 | 6251.86  |               |         |
| 318.301  | 1 | 19078.77 |               |         |
| 345.1057 | 1 | 7243.87  | C15 H18 N2 O6 | (M+Na)+ |
| 437.1942 | 1 | 23759.44 |               |         |
| 438.1971 | 1 | 5972.08  |               |         |
| 453.1677 | 1 | 23368.36 |               |         |
| 454.1712 | 1 | 4665.22  |               |         |
| 659.289  | 1 | 4408.28  |               |         |

#### Formula Calculator Element Limits

| Element | Min | Max |
|---------|-----|-----|
| C       | 3   | 60  |
| H       | 0   | 120 |
| O       | 0   | 30  |
| N       | 0   | 5   |

#### Formula Calculator Results

| Formula       | CalculatedMass | CalculatedMz | Mz       | Diff. (mDa) | Diff. (ppm) | DBE    |
|---------------|----------------|--------------|----------|-------------|-------------|--------|
| C15 H18 N2 O6 | 322.1165       | 345.1057     | 345.1057 | 0.00        | 0.00        | 8.0000 |

--- End Of Report ---

Fig. S4. <sup>1</sup>H NMR (600 MHz) spectrum of **3** in DMSO-*d*<sub>6</sub>

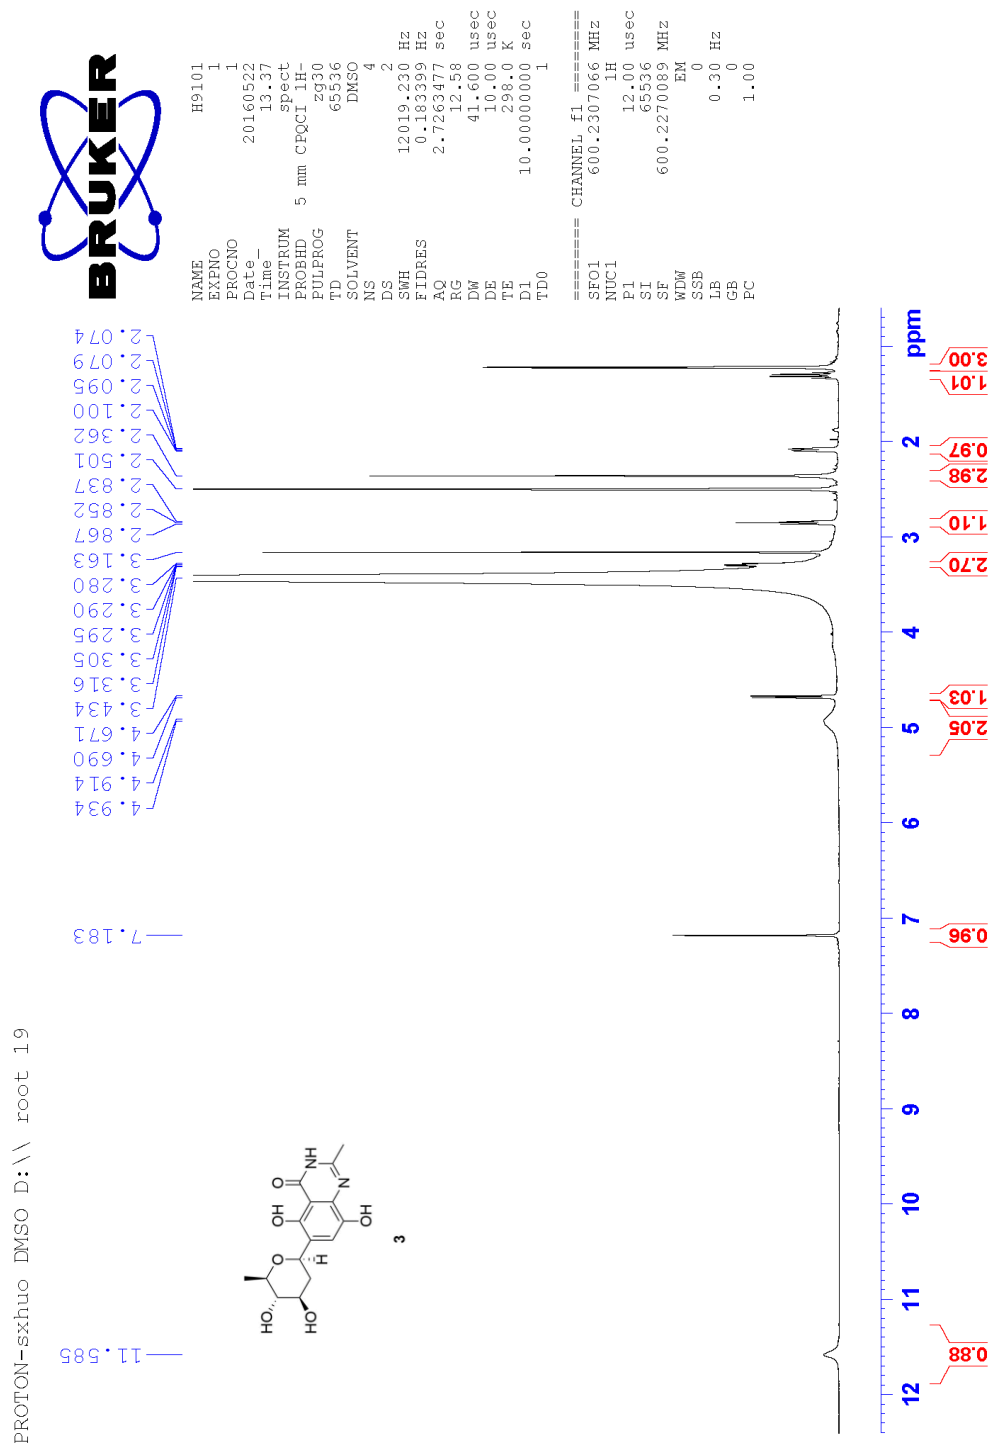

Fig. S5. <sup>13</sup>C NMR (150 MHz) spectrum of **3** in DMSO-d<sub>6</sub>

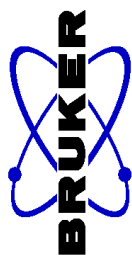

```

NAME      HS101
EXPNO     4
PROCNO    1
Date_     20160522
Time_     14.10
INSTRUM   spect
PROBHD    5 mm CPQCI 1H-
PULPROG   zgpg30
TD         65536
SOLVENT   DMSO
NS         650
DS         4
SWH        36231.883 Hz
FIDRES     0.4522855 Hz
AQ         0.3044468 sec
RG         199.06
DE         13.800 usec
TE         298.0 K
D1         2.00000000 sec
D11        0.03000000 sec
TD0        1

===== CHANNEL f1 =====
SFO1      150.9438010 MHz
NUC1      13C
P1        11.20 usec
SI        131072
SF        150.9272581 MHz
WDW       EM
SSB       0
LB        1.00 Hz
GB        0
PC        1.40
    
```

ZGDC-sxhuo DMSO D:\ root 19

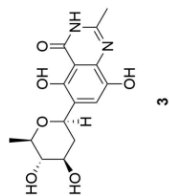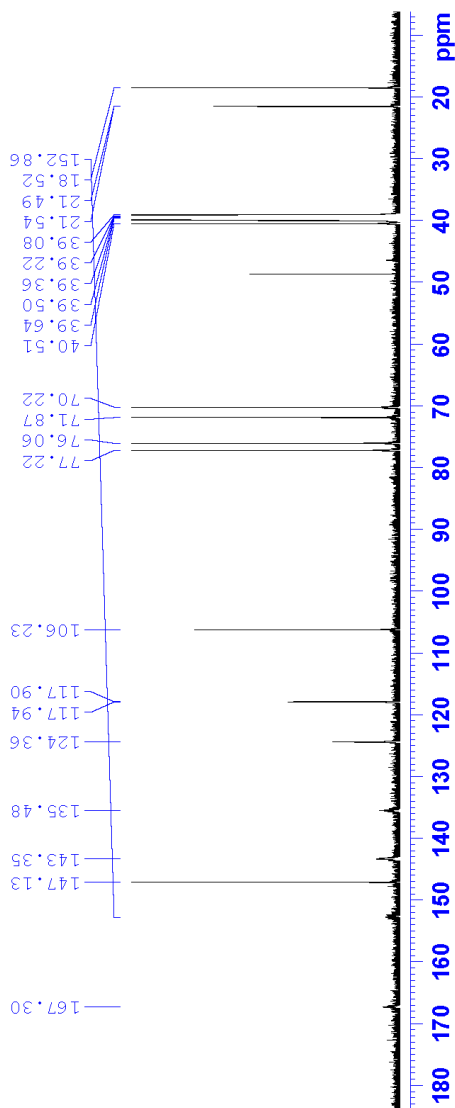

Fig. S6. HSQC (600 MHz) spectrum of **3** in DMSO-*d*<sub>6</sub>

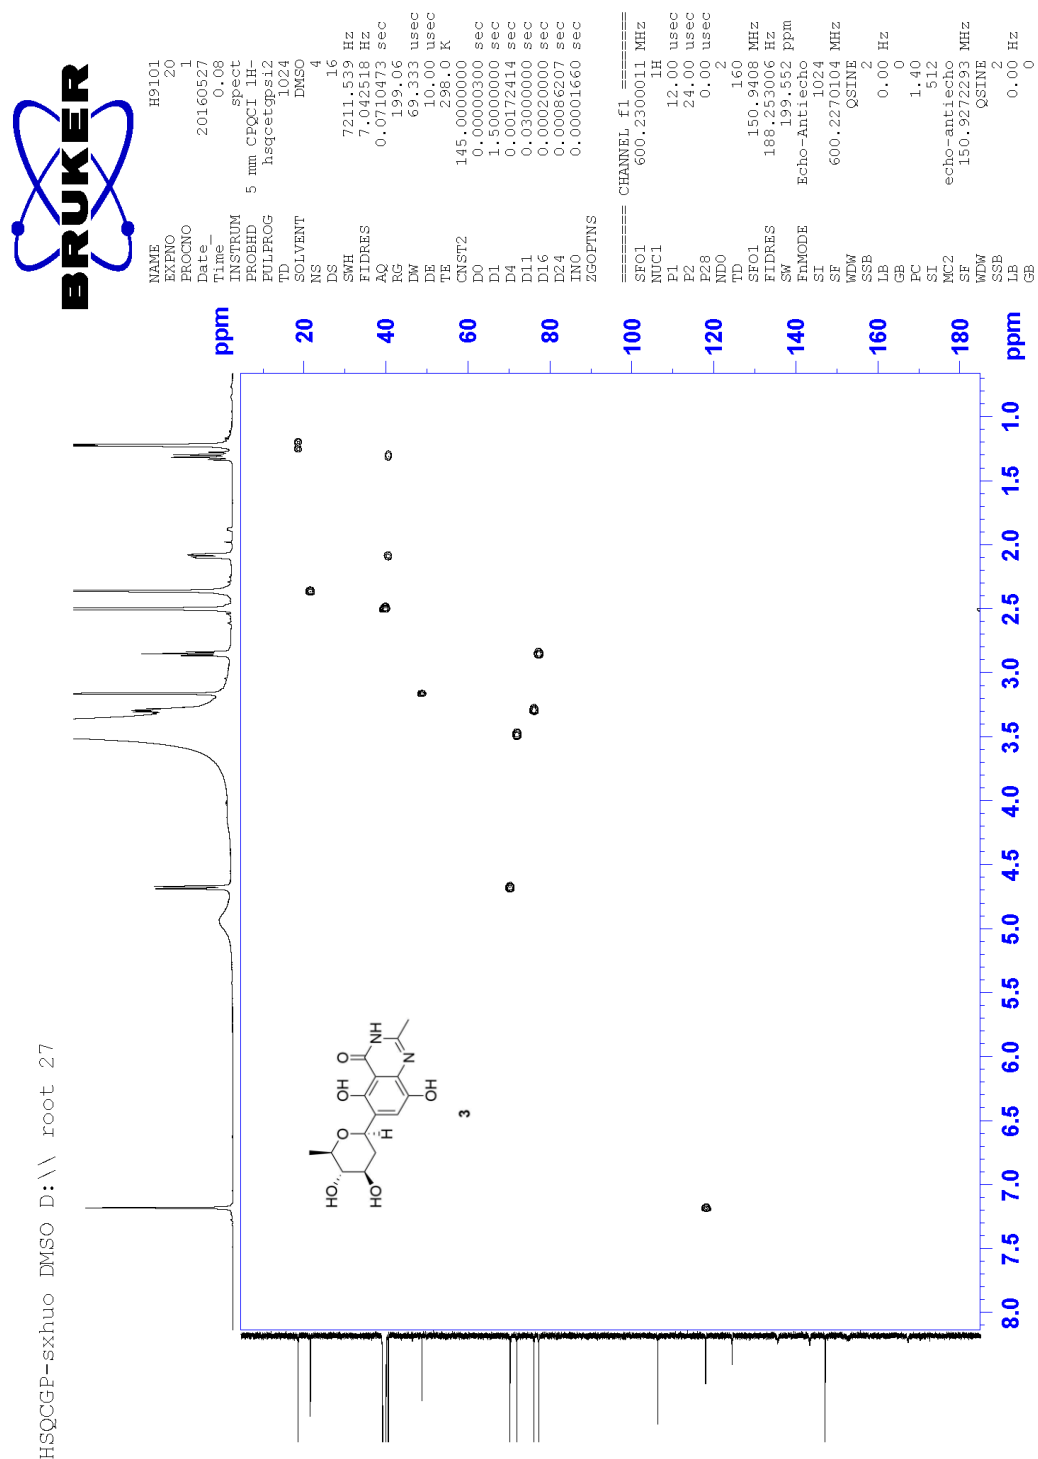

Fig. S7. HMBC (600 MHz) spectrum of **3** in DMSO-*d*<sub>6</sub>

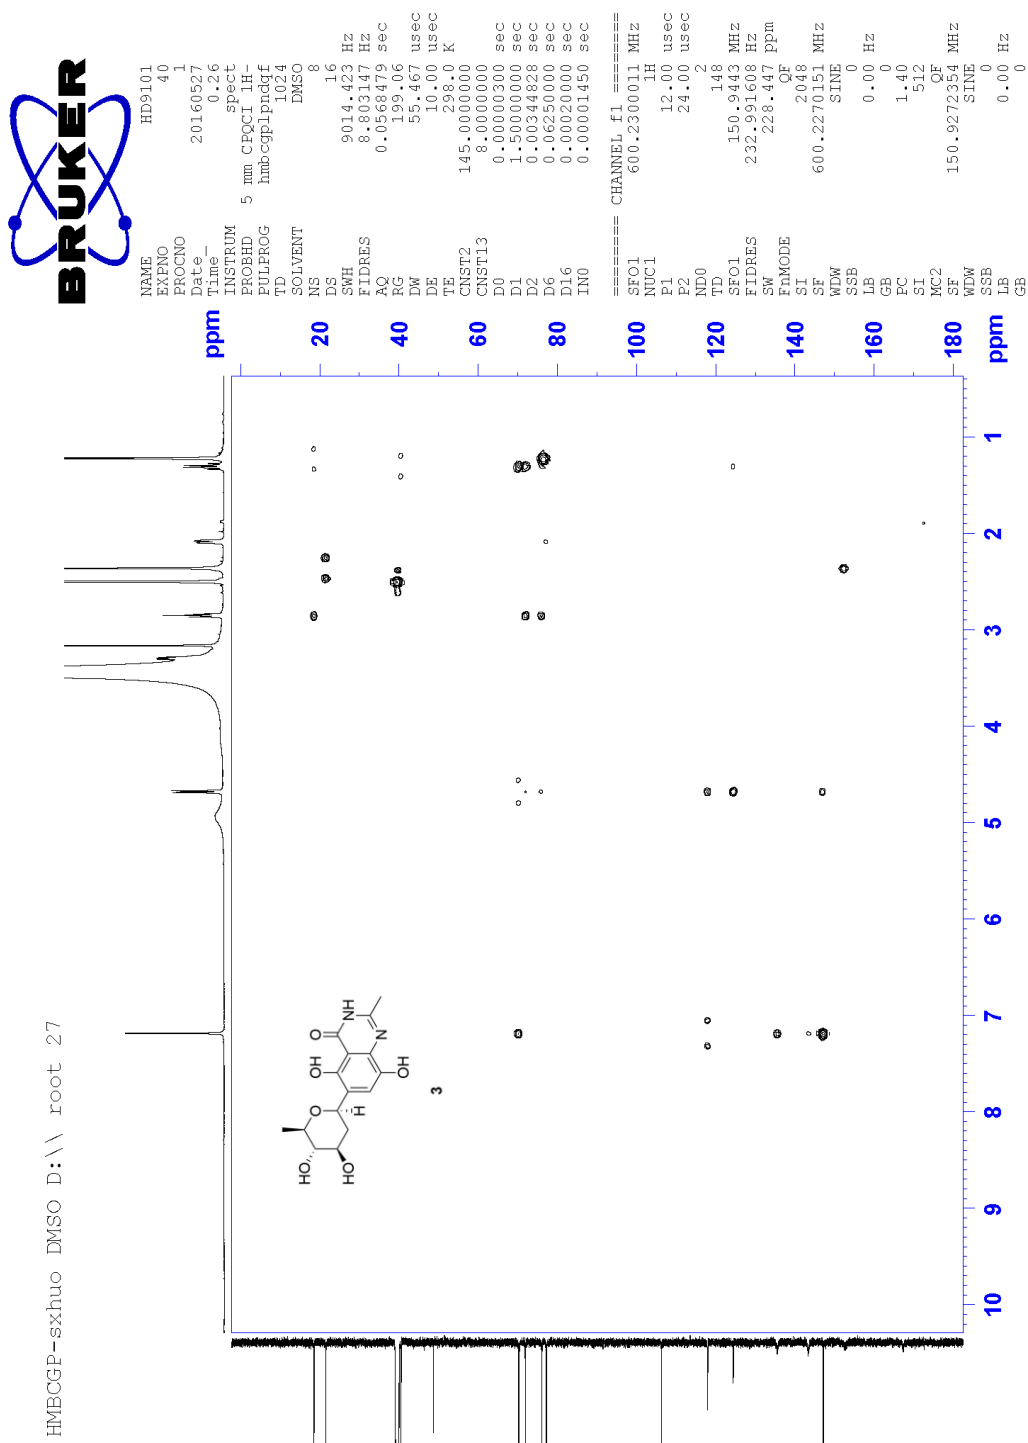

Fig. S8. ROESY (600 MHz) spectrum of **3** in DMSO-*d*<sub>6</sub>

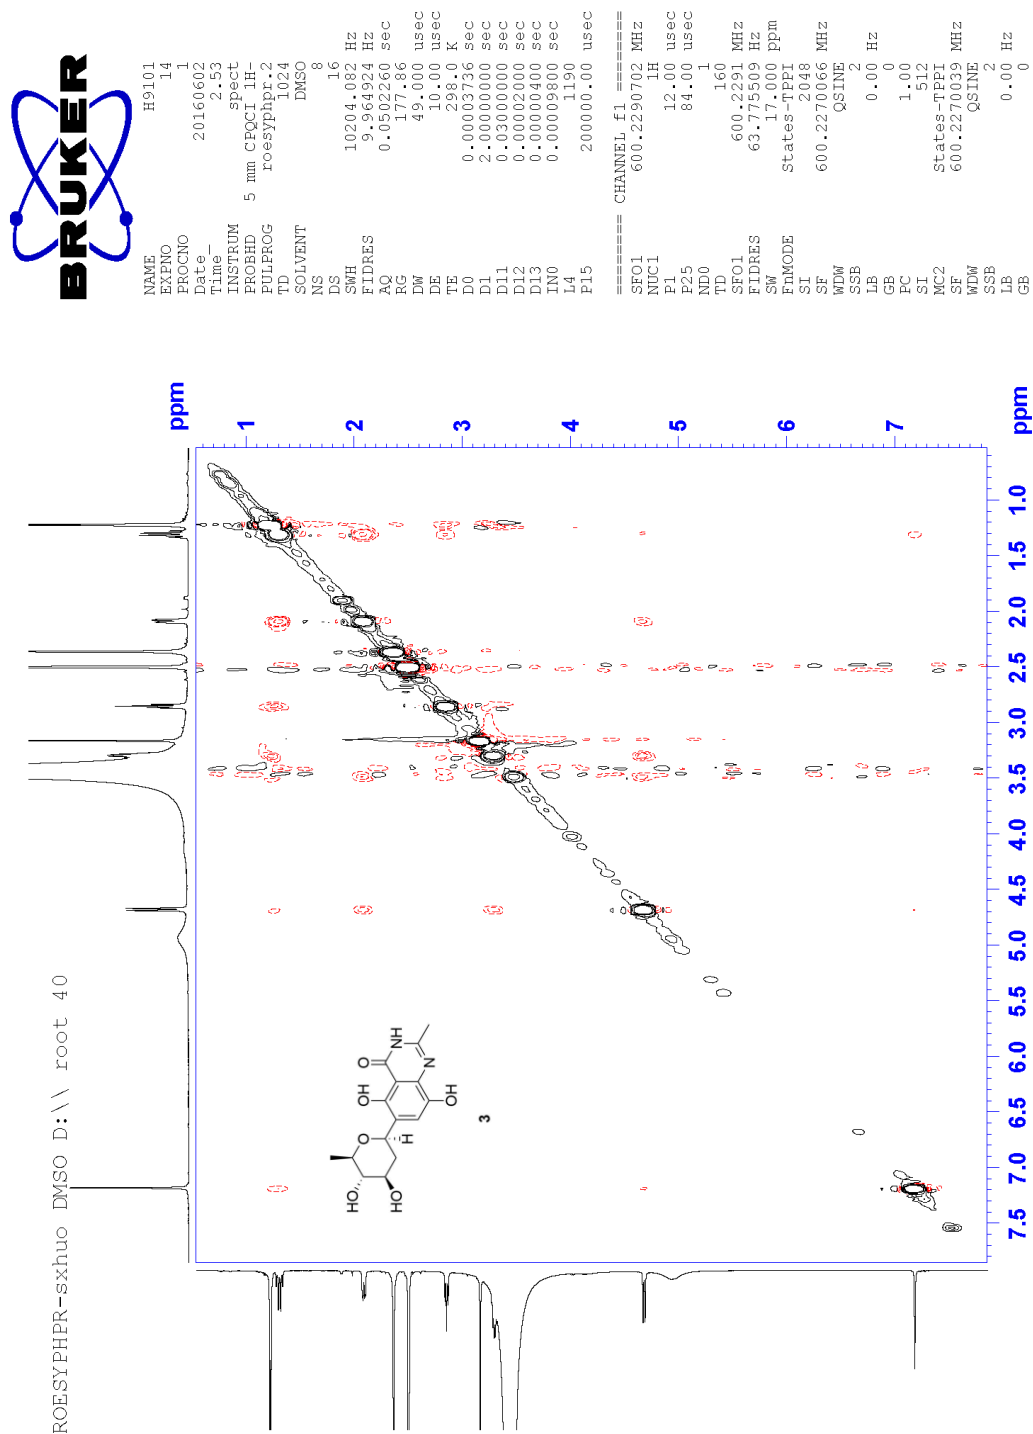



Fig. S9. HRESIMS spectrum of 4

### Qualitative Analysis Report

|                               |              |                      |                      |
|-------------------------------|--------------|----------------------|----------------------|
| <b>Data Filename</b>          | H9102.d      | <b>Sample Name</b>   | H9102                |
| <b>Sample Type</b>            | Sample       | <b>Position</b>      | P1-C2                |
| <b>Instrument Name</b>        | Instrument 1 | <b>User Name</b>     |                      |
| <b>Acq Method</b>             | s.m          | <b>Acquired Time</b> | 3/11/2019 2:29:41 PM |
| <b>IRM Calibration Status</b> | Success      | <b>DA Method</b>     | Default.m            |
| <b>Comment</b>                |              |                      |                      |

|                       |                            |              |
|-----------------------|----------------------------|--------------|
| <b>Sample Group</b>   |                            | <b>Info.</b> |
| <b>Acquisition SW</b> | 6200 series TOF/6500series |              |
| <b>Version</b>        | Q-TOF B.05.01(B5125.2)     |              |

#### User Spectra

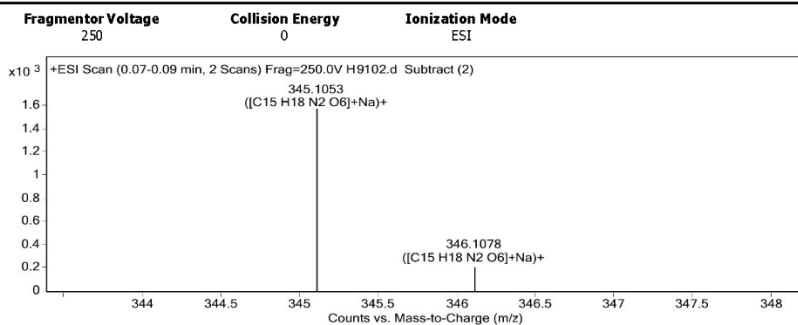

#### Peak List

| m/z      | z | Abund   | Formula       | Ion     |
|----------|---|---------|---------------|---------|
| 285.0241 |   | 218.58  |               |         |
| 330.8971 |   | 287.57  |               |         |
| 337.0899 |   | 270.67  |               |         |
| 345.1053 | 1 | 1573.57 | C15 H18 N2 O6 | (M+Na)+ |
| 346.1078 | 1 | 215.08  | C15 H18 N2 O6 | (M+Na)+ |
| 367.0887 |   | 294.34  |               |         |
| 399.1062 |   | 238.65  |               |         |
| 437.1944 | 1 | 2455.96 |               |         |
| 438.1994 | 1 | 618.82  |               |         |
| 659.2844 | 1 | 302.24  |               |         |

#### Formula Calculator Element Limits

| Element | Min | Max |
|---------|-----|-----|
| C       | 3   | 60  |
| H       | 0   | 60  |
| O       | 0   | 10  |
| N       | 0   | 3   |

#### Formula Calculator Results

| Formula       | CalculatedMass | CalculatedMz | Mz       | Diff. (mDa) | Diff. (ppm) | DBE    |
|---------------|----------------|--------------|----------|-------------|-------------|--------|
| C15 H18 N2 O6 | 322.1165       | 345.1057     | 345.1053 | 0.40        | 1.16        | 8.0000 |

--- End Of Report ---

Fig. S10. <sup>1</sup>H NMR (600 MHz) spectrum of **4** in DMSO-*d*<sub>6</sub>

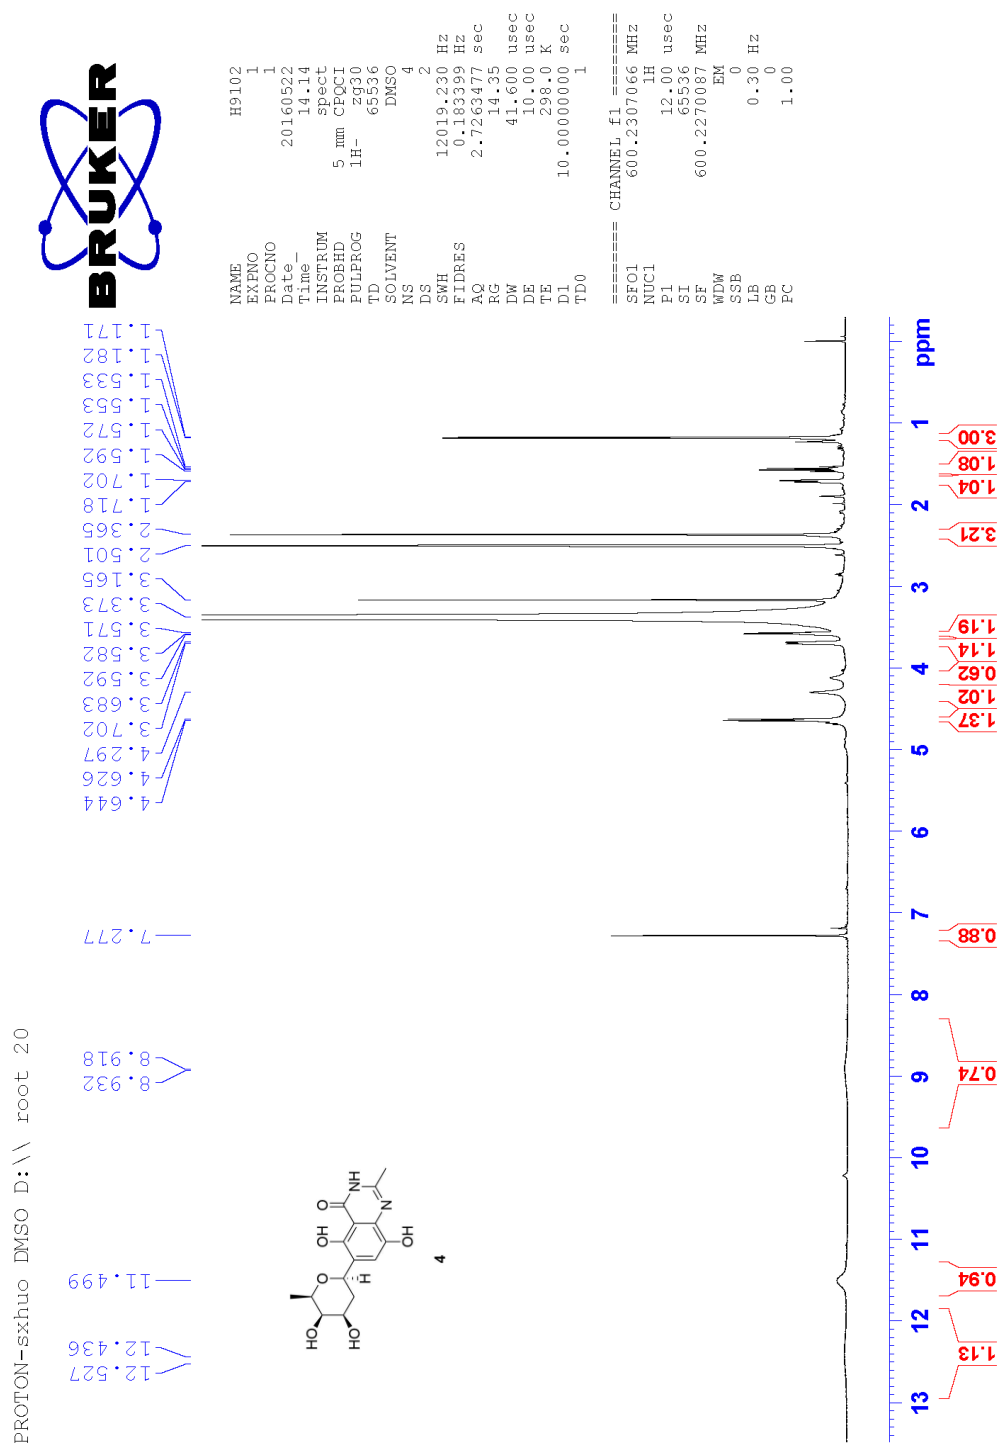

Fig. S11.  $^{13}\text{C}$  NMR (150 MHz) spectrum of **4** in  $\text{DMSO-}d_6$

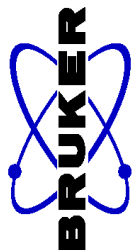

```

NAME          H9102
EXPNO         4
PROCNO        1
Date_         20160522
Time_        14.47
INSTRUM       spect
PROBHD        5 mm CQCI 1H-
PULPROG       zgpg
TD            65536
SOLVENT       DMSO
NS            650
DS            4
SWH           36231.883 Hz
FIDRES        0.552855 Hz
AQ            0.9044468 sec
RG            199.06
DW            13.800 usec
DE            18.00 usec
TE            298.0 K
D1            2.0000000 sec
D11           0.03000000 sec
TD0           1
===== CHANNEL f1 =====
SFO1          150.9438010 MHz
NUC1          13C
P1            11.20 usec
SI            131072
SF            150.9272672 MHz
WDW           EM
SSB           0
LB            1.00 Hz
GB            0
PC            1.40
  
```

ZGDC-sxihu DMSO D:\ root 20

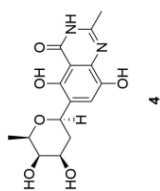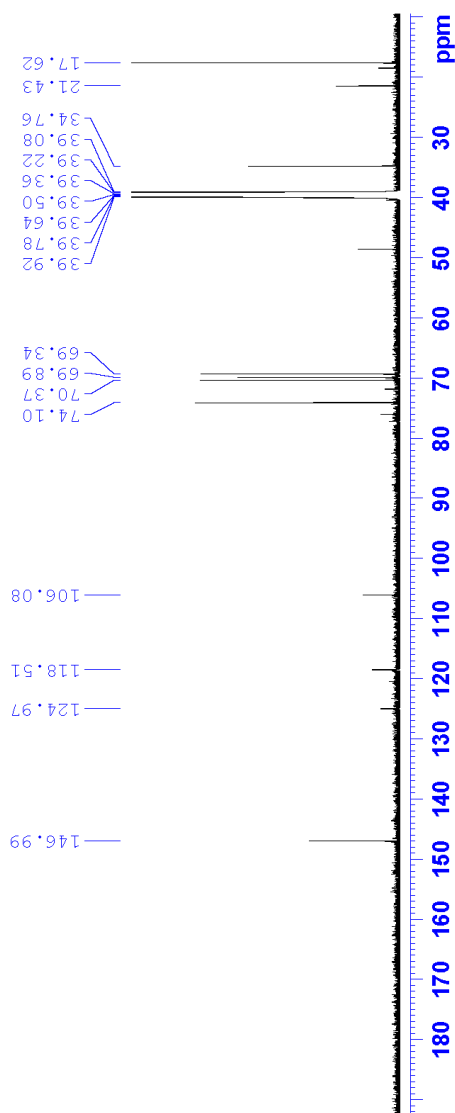

Fig. S12. HSQC (600 MHz) spectrum of **4** in DMSO-*d*<sub>6</sub>

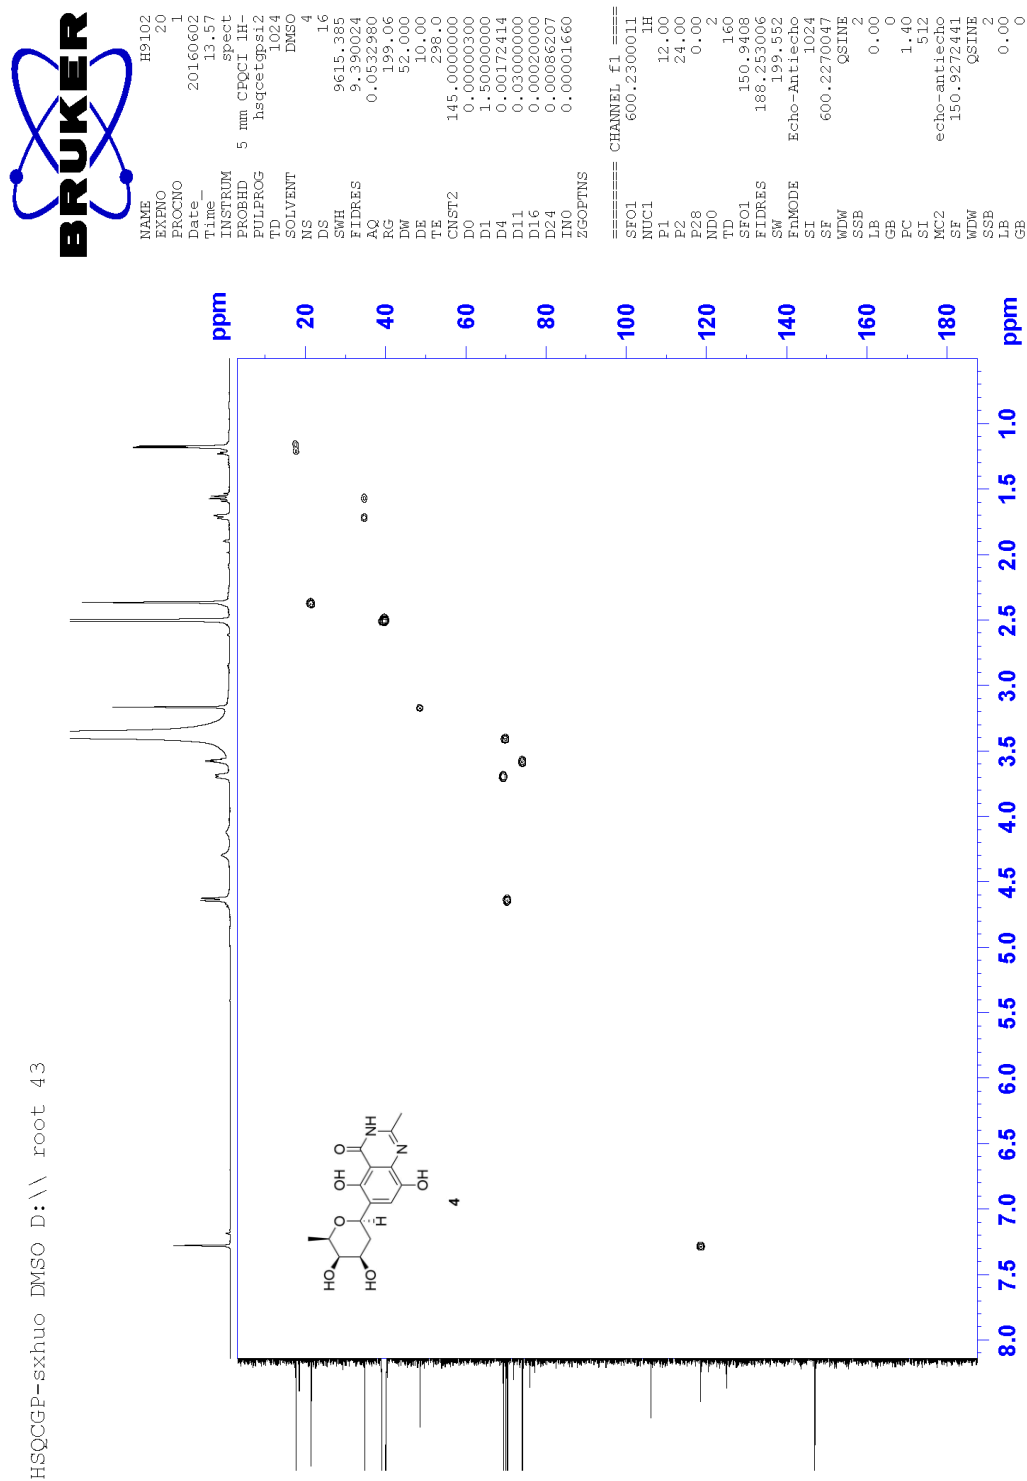

Fig. S13. HMBC (600 MHz) spectrum of **4** in DMSO-*d*<sub>6</sub>

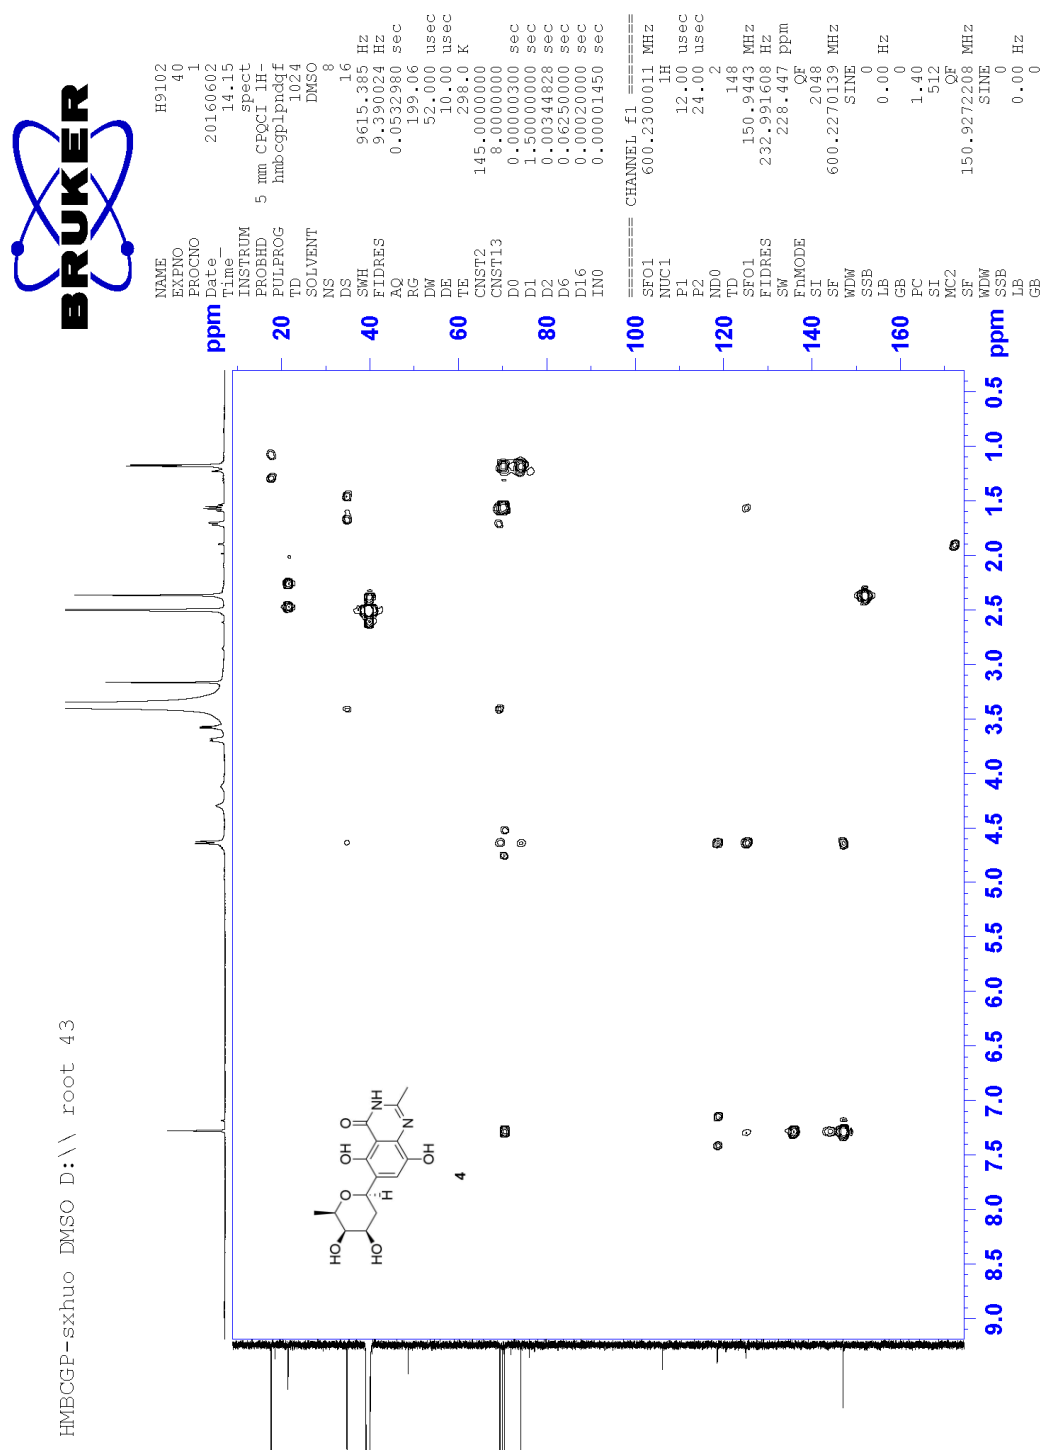

Fig. S14. ROESY (600 MHz) spectrum of **4** in DMSO-*d*<sub>6</sub>

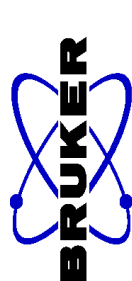

```

NAME      HS102
EXPNO     14
PROCNO    1
Date_     20160602
Time_     13:07
INSTRUM   spect
PROBHD    5 mm CPOCI 1H-
PULPROG   roesyphpr.2
TD         1024
SOLVENT   DMSO
NS         8
DS         16
SWH        9615.365 Hz
FIDRES     9.1390024 Hz
AQ         0.0532980 sec
RG         199.06
DW         52.000 usec
DE         10.00 usec
TE         298.0 K
D0         0.00004046 sec
D1         2.00000000 sec
D11        0.03000000 sec
D12        0.00002000 sec
D13        0.00000400 sec
IN0        0.00010420 sec
L4         1190
P15        200000.00 usec

===== CHANNEL f1 =====
SF01      600.2290330 MHz
NUC1       1H
P25        12.00 usec
ND0         84.00 usec
TD          160
SF01      600.229 MHz
FIDRES     59.980804 Hz
SW         15.989 ppm
FnmODE     States-TPPI
SI         2048
SF         600.2270056 MHz
WDW        QSINE
SSB         2
LB         0.00 Hz
GB         1.00
PC         1.00
SI         1512
MC2        States-TPPI
SF         600.2270051 MHz
WDW        QSINE
SSB         2
LB         0.00 Hz
GB         0
    
```

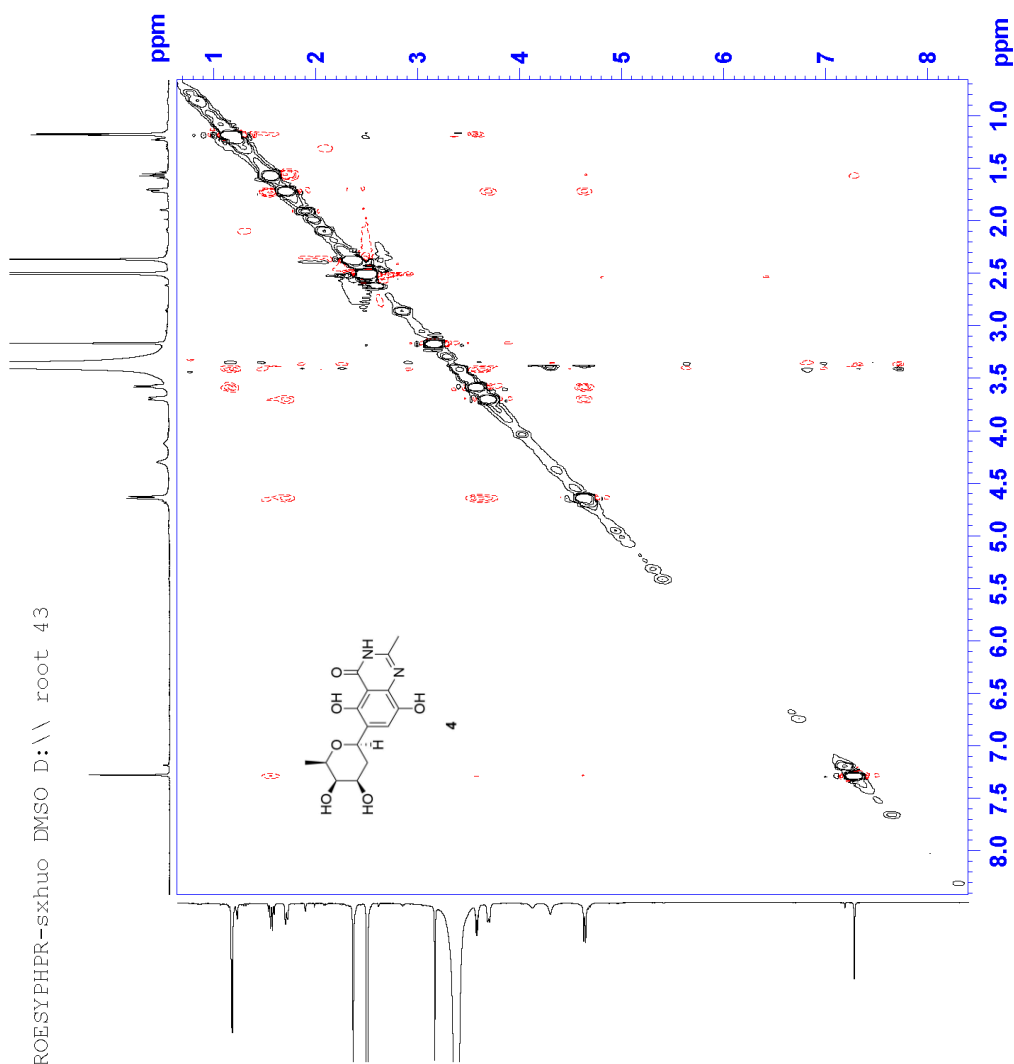

Fig. S15. HRESIMS spectrum of 5

### Qualitative Analysis Report

|                               |              |                      |                   |
|-------------------------------|--------------|----------------------|-------------------|
| <b>Data Filename</b>          | H9103.d      | <b>Sample Name</b>   | H9103             |
| <b>Sample Type</b>            | Sample       | <b>Position</b>      | P1-A1             |
| <b>Instrument Name</b>        | Instrument 1 | <b>User Name</b>     |                   |
| <b>Acq Method</b>             | s.m          | <b>Acquired Time</b> | 3/20/2019 4:08:33 |
| <b>IRM Calibration Status</b> | Success      | <b>DA Method</b>     | PM Default.m      |
| <b>Comment</b>                |              |                      |                   |

|                       |                             |
|-----------------------|-----------------------------|
| <b>Sample Group</b>   | <b>Info.</b>                |
| <b>Acquisition SW</b> | 6200 series TOF/6500 series |
| <b>Version</b>        | Q-TOF B.05.01 (B5125.2)     |

#### User Spectra

|                    |                  |                 |
|--------------------|------------------|-----------------|
| Fragmentor Voltage | Collision Energy | Ionization Mode |
| 250                | 0                | ESI             |

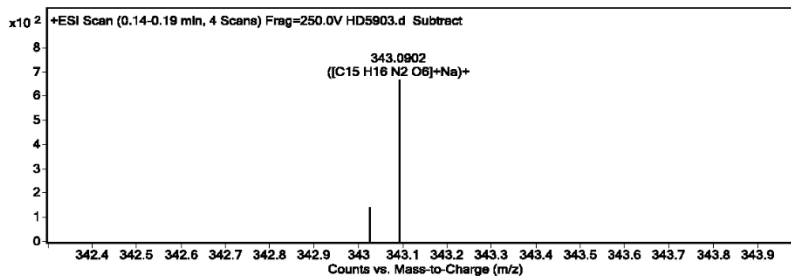

#### Peak List

| <i>m/z</i> | <i>z</i> | Abund    |
|------------|----------|----------|
| 285.0217   | 1        | 2646.84  |
| 299.1254   | 1        | 2326.36  |
| 345.1056   | 1        | 19489.03 |
| 346.1087   | 1        | 2973.38  |
| 371.1583   | 1        | 2529.09  |
| 437.1937   | 1        | 54439.48 |
| 438.1968   | 1        | 14210.92 |
| 453.1679   | 1        | 2502.27  |
| 659.2874   | 1        | 2891.54  |
| 675.2608   | 1        | 2747.1   |

#### Formula Calculator Element Limits

| Element | Min | Max |
|---------|-----|-----|
| C       | 3   | 60  |
| H       | 0   | 60  |
| O       | 0   | 10  |
| N       | 0   | 10  |

#### Formula Calculator Results

| Formula       | CalculatedMass | CalculatedMz | Mz       | Diff. (mDa) | Diff. (ppm) | DBE    |
|---------------|----------------|--------------|----------|-------------|-------------|--------|
| C15 H16 N2 O6 | 320.1008       | 343.0901     | 343.0902 | -0.10       | -0.29       | 9.0000 |

--- End Of Report ---

Fig. S16. <sup>1</sup>H NMR (600 MHz) spectrum of **5** in DMSO-*d*<sub>6</sub>

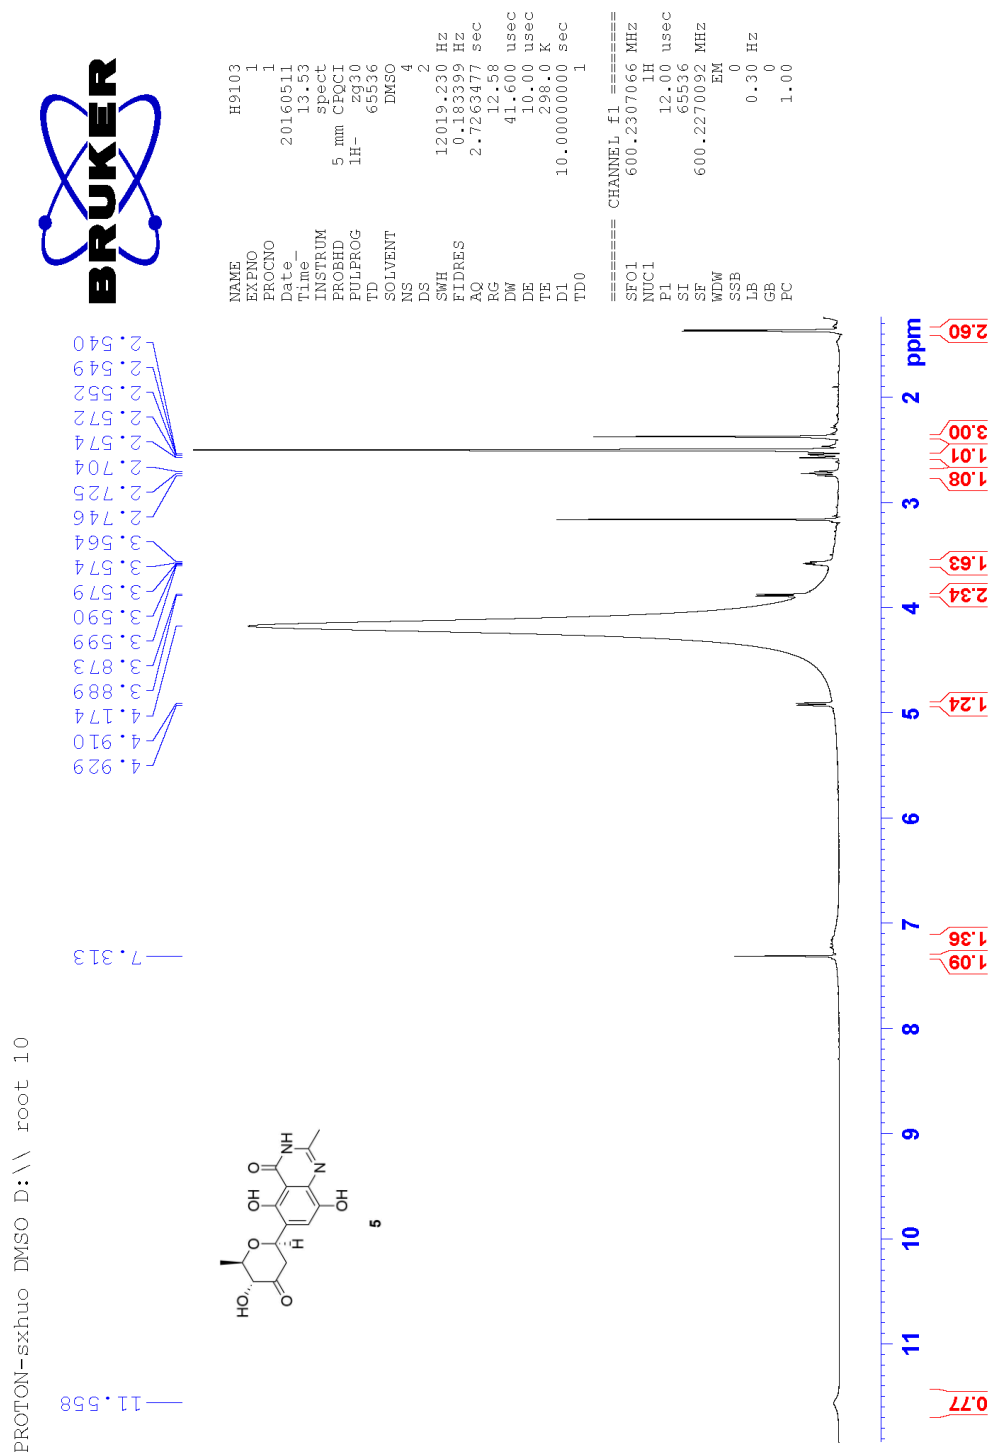



Fig. S17. <sup>13</sup>C NMR (150 MHz) spectrum of **5** in DMSO-*d*<sub>6</sub>

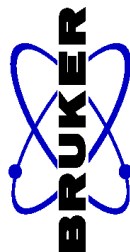

ZGDC-sxhuo DMSO D:\ root 10

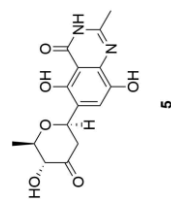

```

NAME          H9103
EXPNO         4
PROCNO        1
Date_         20160511
Time_        21.25
INSTRUM       spect
PROBHD        5 mm CPQCI 1H-
PULPROG       zgpg30
TD            65536
SOLVENT       DMSO
NS            650
DS            4
SWH           36231.883 Hz
FIDRES        0.552855 Hz
AQ            0.9044468 sec
RG            199.06
DE            13.800 usec
TE            298.0 K
D1            2.00000000 sec
D11           0.03000000 sec
TD0           1
===== CHANNEL f1 =====
SFO1          150.9438010 MHz
NUC1          13C
P1            11.20 usec
SI            131072
SF            150.9272586 MHz
WDW           EM
SSB           0
LB            1.00 Hz
GB            0
PC            1.40
    
```

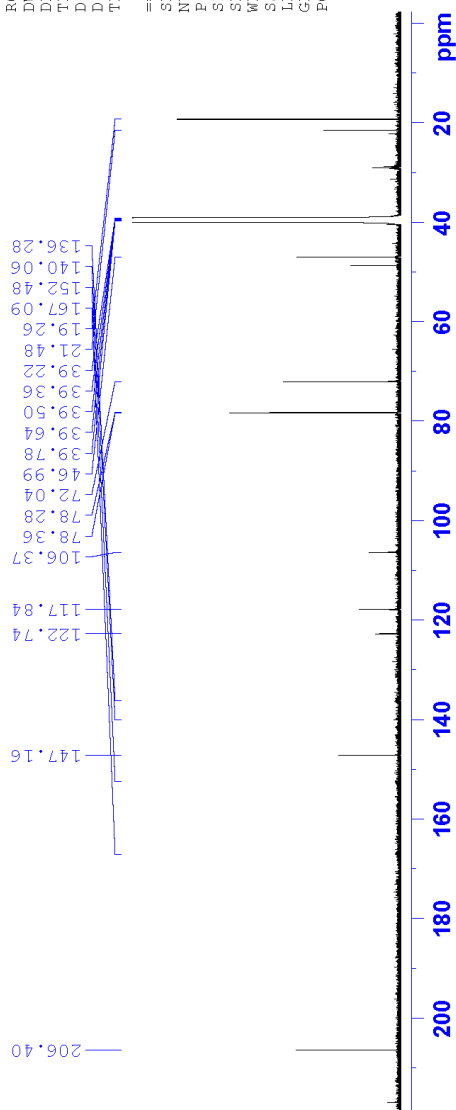

Fig. S18. HSQC (600 MHz) spectrum of **5** in DMSO-*d*<sub>6</sub>

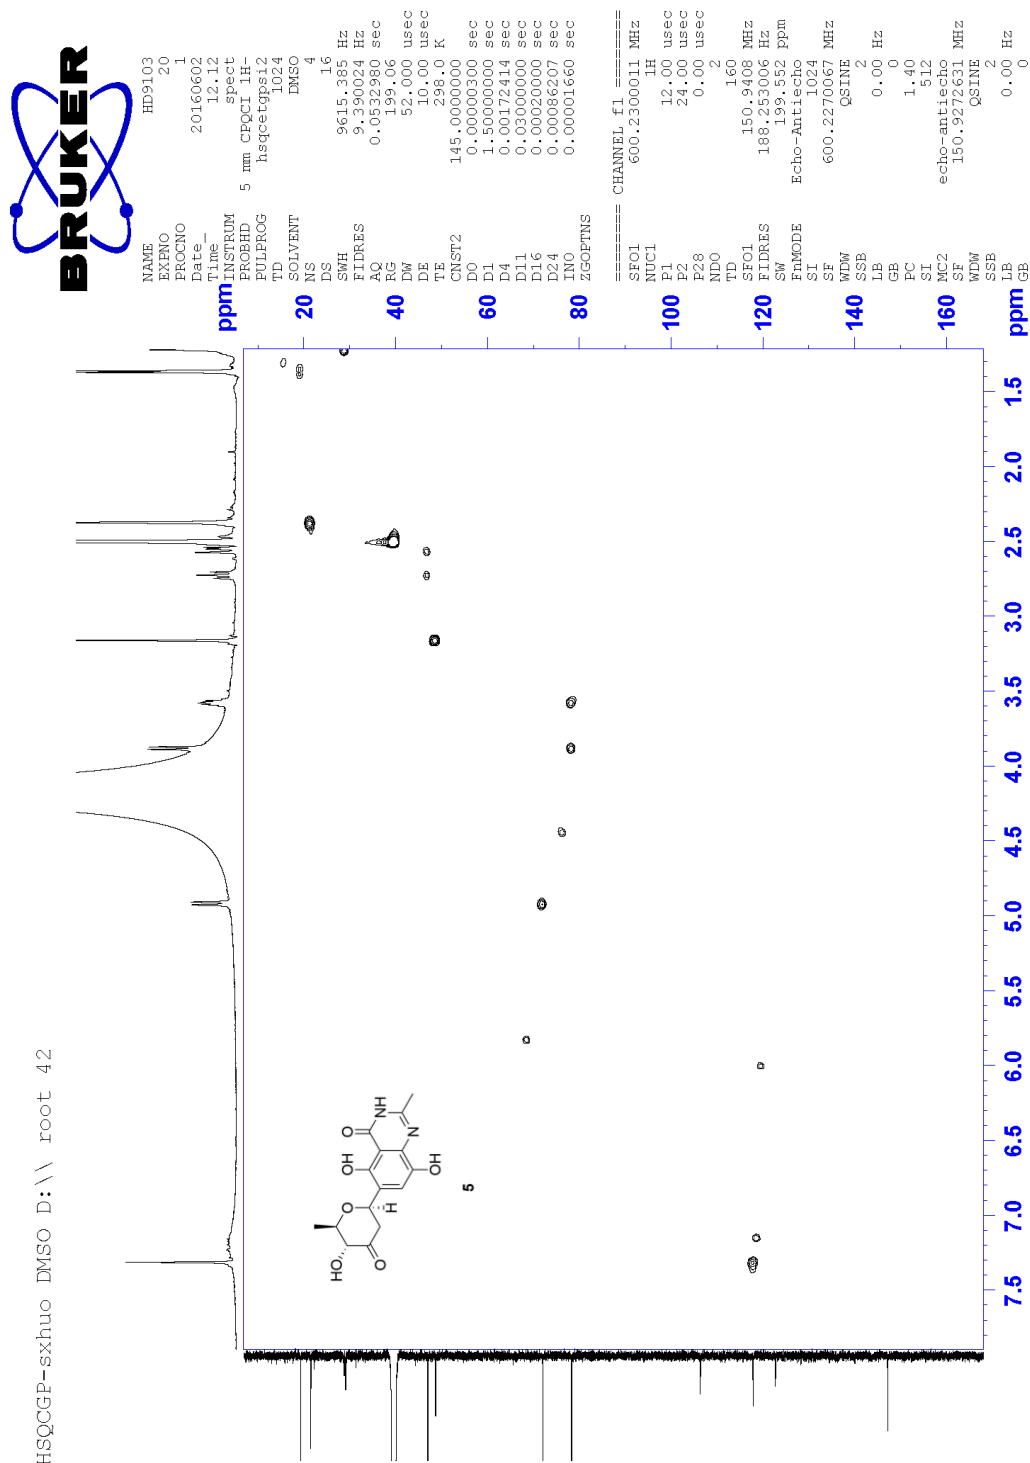

Fig. S19. HMBC (600 MHz) spectrum of **5** in DMSO-*d*<sub>6</sub>

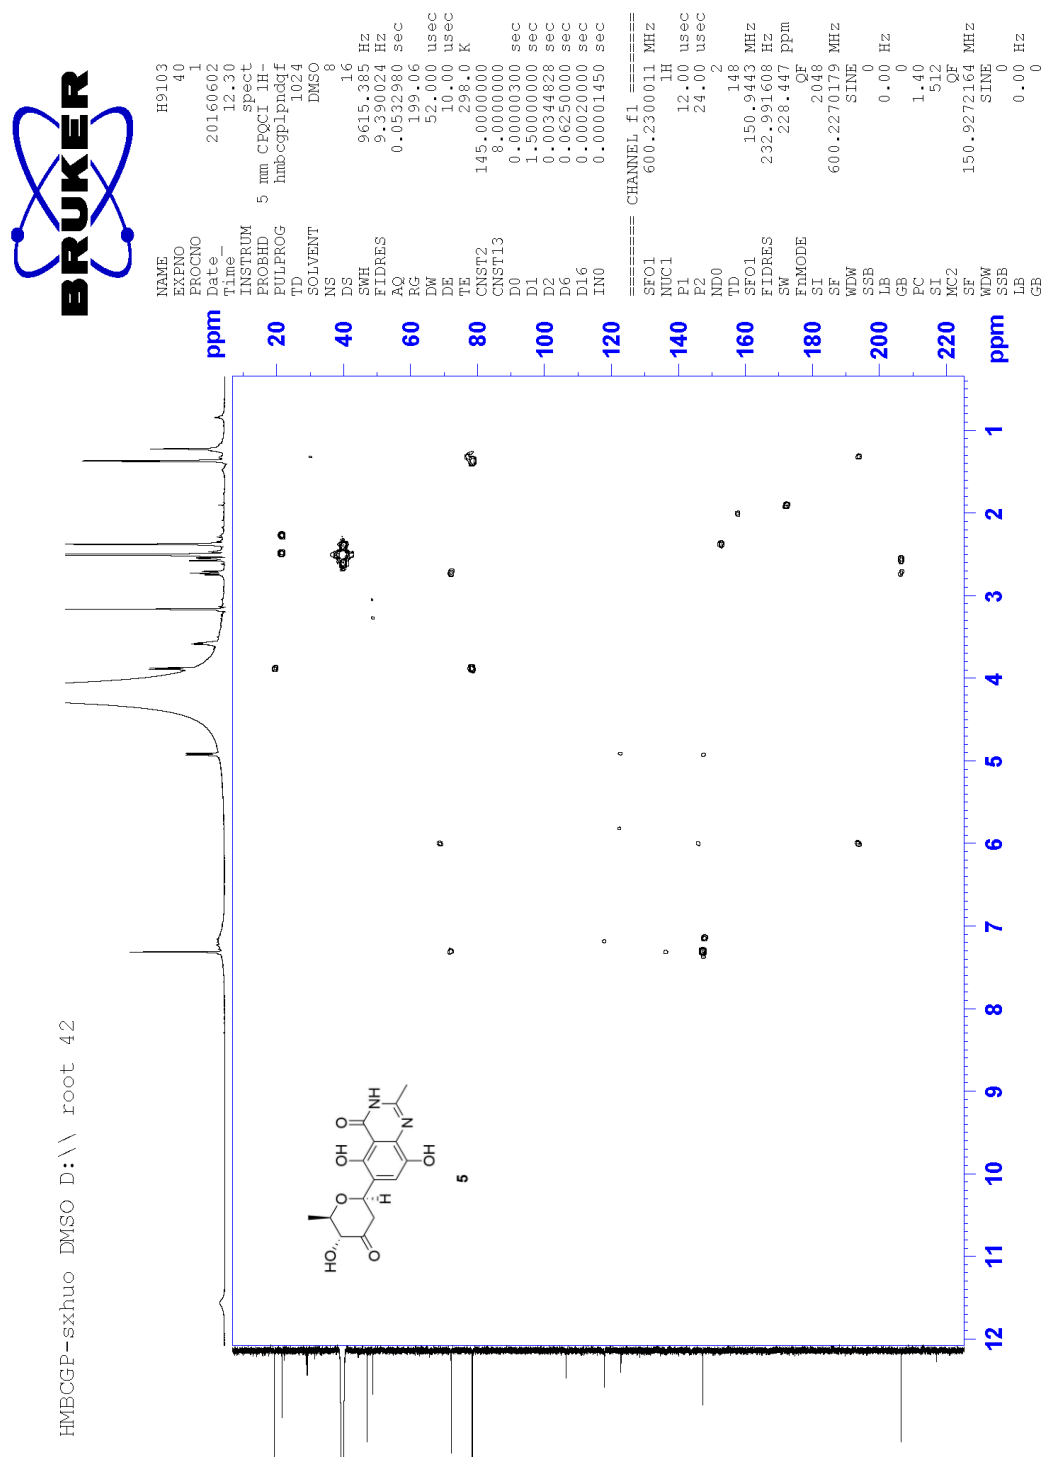

Fig. S20. ROESY (600 MHz) spectrum of **5** in DMSO-*d*<sub>6</sub>

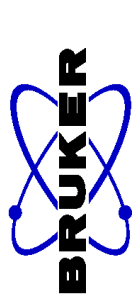

```

NAME      H9103
EXNO     L4
PROCNO   1
Date     20160602
Time     11.22
INSTRUM spect
PROBHD   5 mm CPOCI 1H-
PULPROG roesyphpr.2
TD       1024
SOLVENT  DMSO
NS       8
DS       16
SWH      9615.385 Hz
FIDRES   9.390024 Hz
AQ        0.0532980 sec
RG        157.96
DM        52.000 usec
DE        10.00 usec
TE        298.0 K
D0        0.00004046 sec
D1        2.00000000 sec
D11       0.03000000 sec
D12       0.00002000 sec
D13       0.00000400 sec
IN0       0.00010420 sec
L4        1190
P15       2000000.00 usec

===== CHANNEL f1 =====
SF01     600.2295156 MHz
NUC1     1H
P1       12.00 usec
E25      84.00 usec
ND0      1
TD        160
SF01     600.2295 MHz
FIDRES   59.980804 Hz
SW        15.989 ppm
FhMODE   States-TPPI
SI        2048
SF       600.2270074 MHz
WDW      QSINE
SSB      2
LB       0.00 Hz
GB       0
PC       1.00
RC       512
SI       States-TPPI
MC2      600.2263944 MHz
SF       600.2263944 MHz
WDW      QSINE
SSB      2
LB       0.00 Hz
GB
  
```

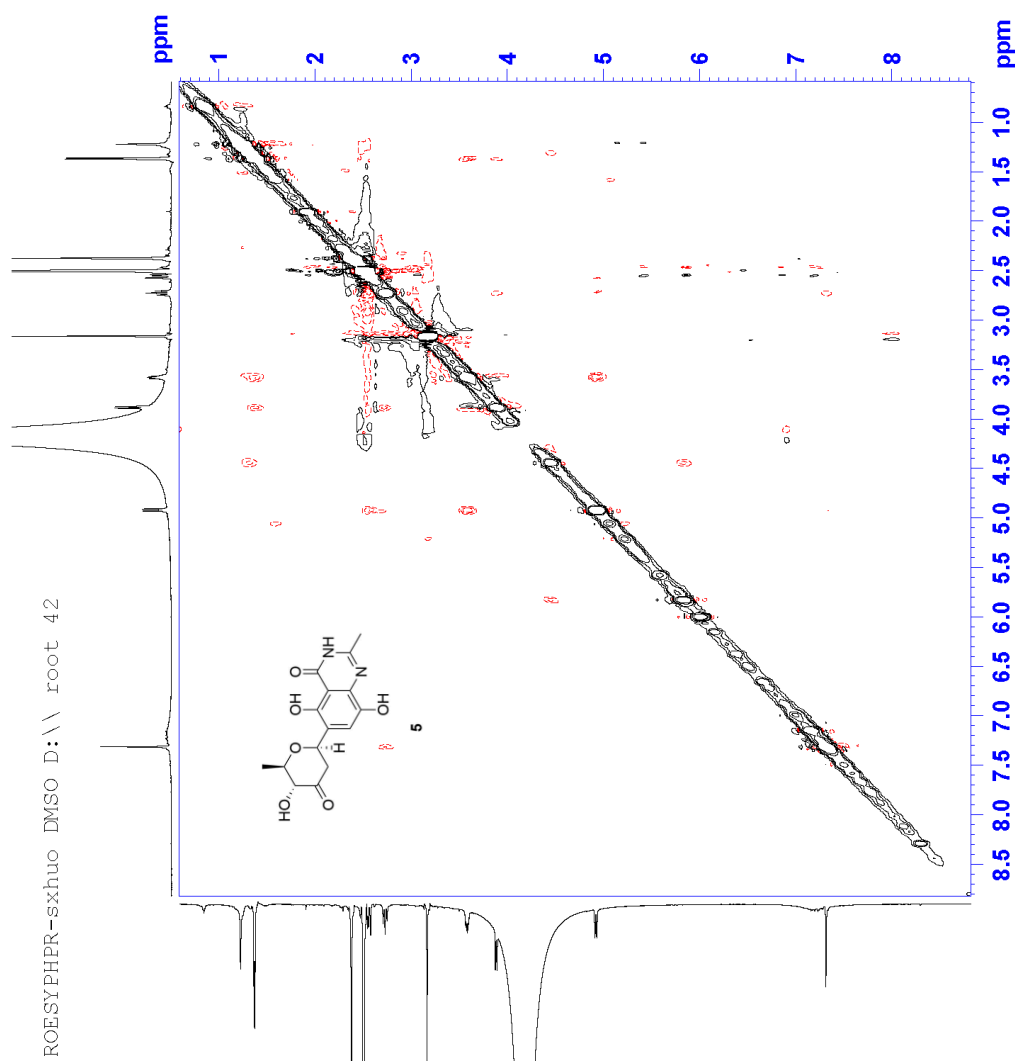

Fig. S21. <sup>1</sup>H NMR (600 MHz) spectrum of **8** in DMSO-*d*<sub>6</sub>

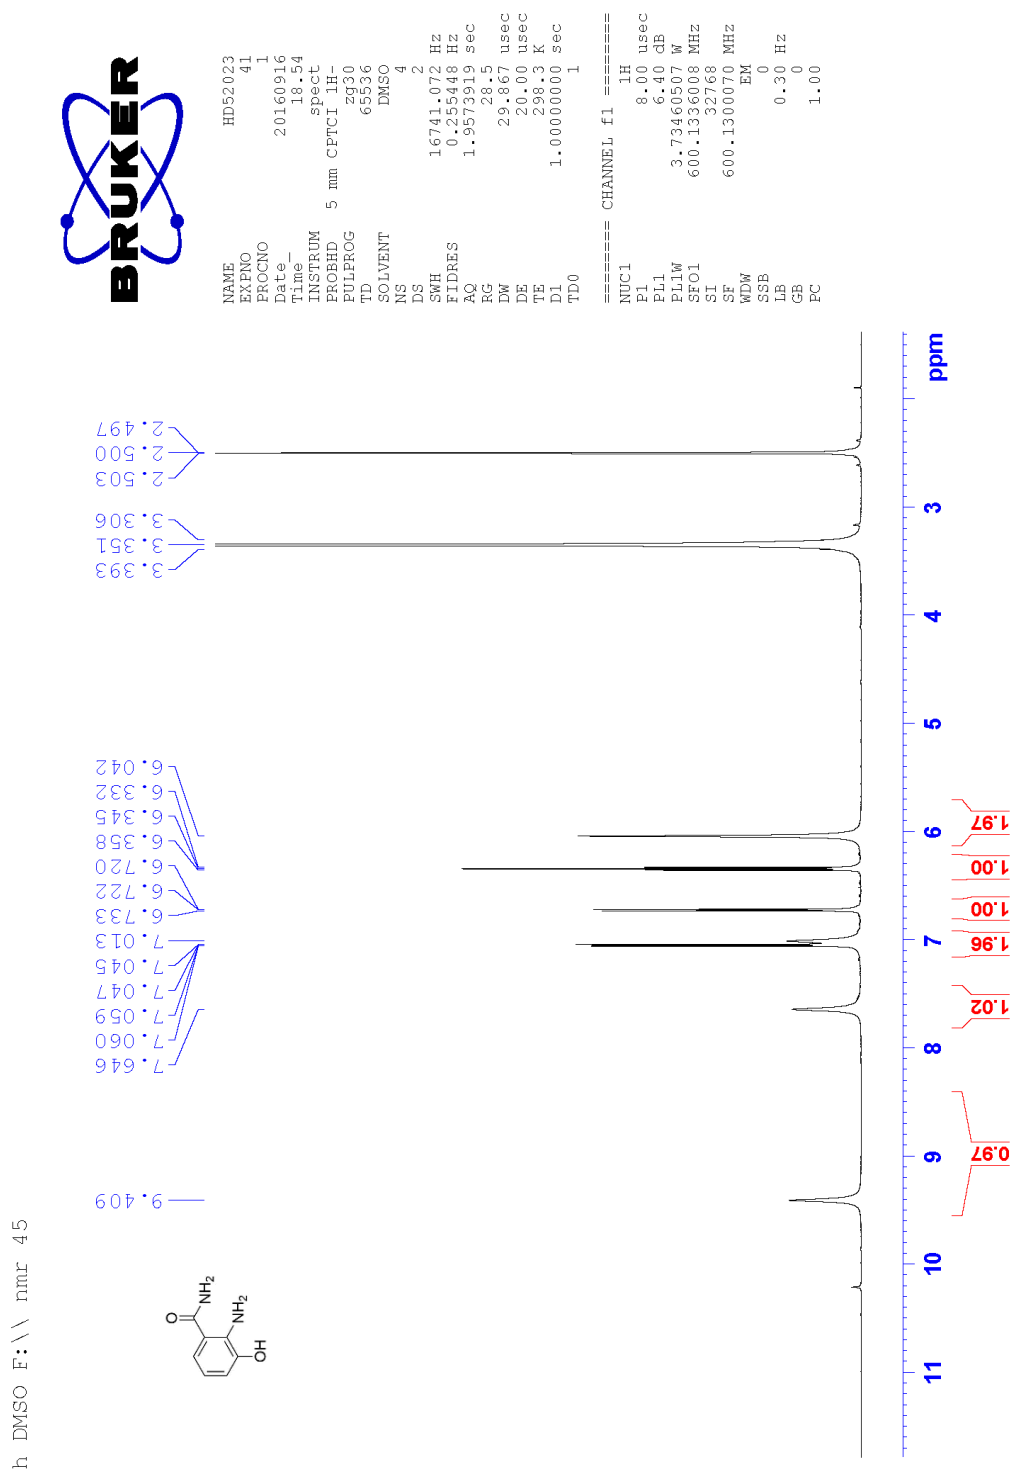

Fig. S22.  $^{13}\text{C}$  NMR (150 MHz) spectrum of **8** in  $\text{DMSO-}d_6$

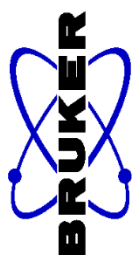

c13 DMSO F:\n nmr 45

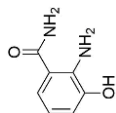

```

NAME HD52023
EXPNO 2
PROCNO 1
Date_ 20160918
Time 13.18
INSTRUM spect
PROBHD 5 mm CPYX
PULPROG zgpg30
TD 65536
SOLVENT DMSO
NS 1024
DS 4
SFR 39062.500 Hz
FIDRES 0.596046 Hz
AQ 0.8385108 sec
RG 2050
DQ 12.800 usec
DE 0.0000000 usec
TE 298.5 K
D1 2.00000000 sec
D11 0.03000000 sec
TDO 1
===== CHANNEL f1 =====
NUC1 13C
P1 12.00 usec
PL1 0.00 dB
PL12 93.443 dB
SFO1 150.9194083 MHz
===== CHANNEL f2 =====
NAME waltz16
PROCNO 1
PCPD2 80.00 usec
PL2 9.20 dB
PL12 25.68 dB
PL29 1.95994878 W
PLD29 0.04400001 M
SFO2 600.152768 MHz
SI 32768
SF 150.9028733 MHz
WDW EM
SFB 0
GB 0
PC 1.40
  
```

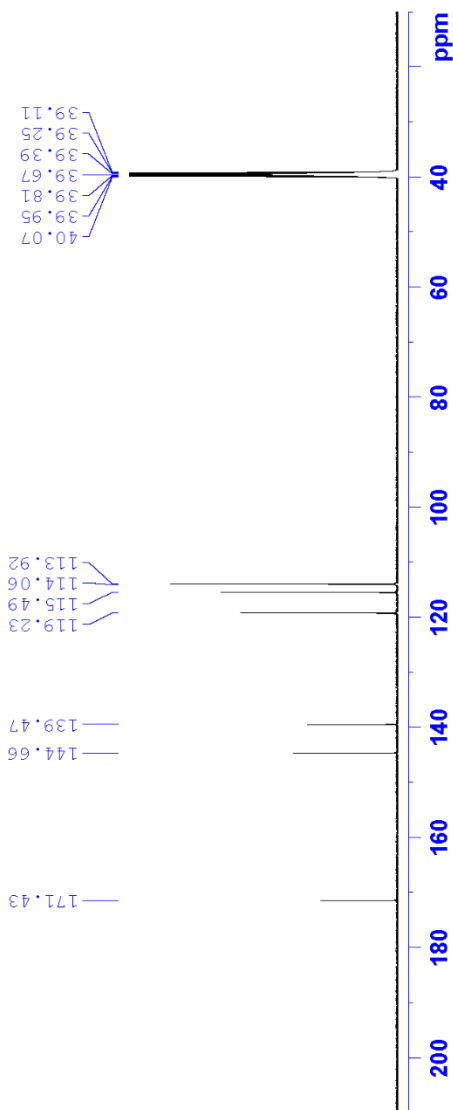

Fig. S23.  $^1\text{H}$  NMR (400 MHz) spectrum of **9** in  $\text{DMSO-}d_6$

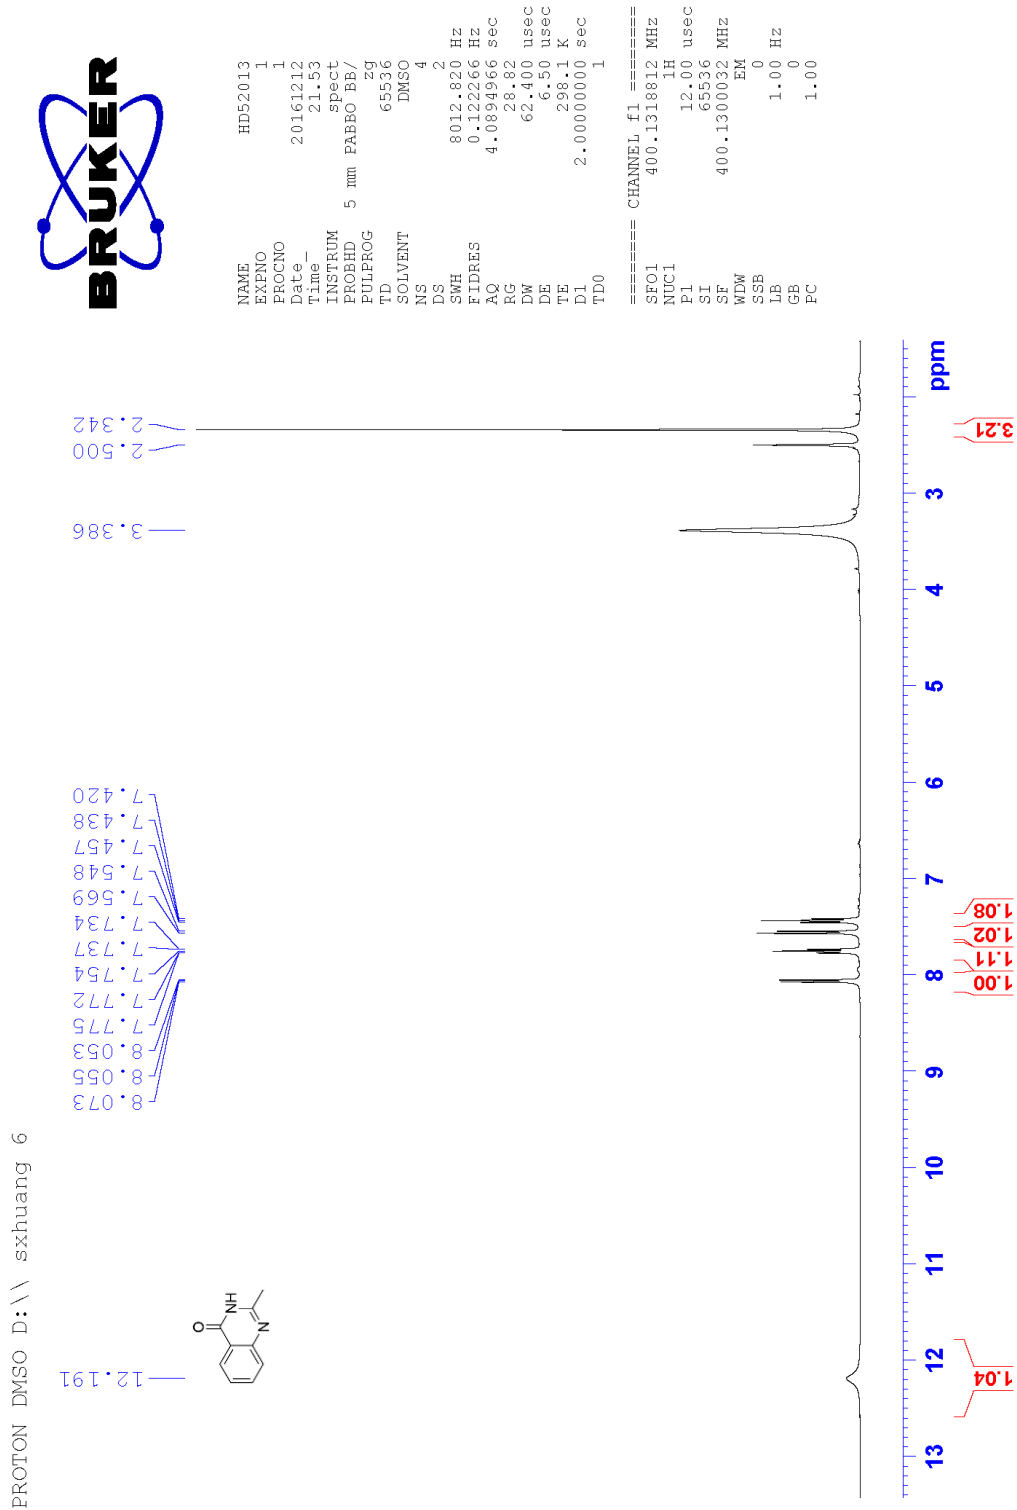

Fig. S24.  $^1\text{H}$  NMR (100 MHz) spectrum of **9** in  $\text{DMSO-}d_6$



c13 DMSO D:\ \ sxhuang 6

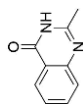

```

NAME          HD52013
EXPNO         4
PROCNO        1
Date_         20161212
Time_         22.21
INSTRUM       spect
PROBHD        5 mm PABBO BB/
PULPROG       zgpg30
TD            65536
SOLVENT       DMSO
NS            350
DS            4
SWH           24038.461 Hz
FIDRES        0.366798 Hz
AQ            1.3631988 sec
RG            214.83
DW            20.800 usec
DE            6.50 usec
TE            298.1 K
D1            3.0000000 sec
D11           0.0300000 sec
TD0           1
===== CHANNEL f1 =====
SFO1          100.6240376 MHz
NUC1          13C
P1            12.00 usec
SI            32768
SF            100.6128137 MHz
WDW           EM
SSB           0
LB            1.00 Hz
GB            0
PC            1.40
    
```

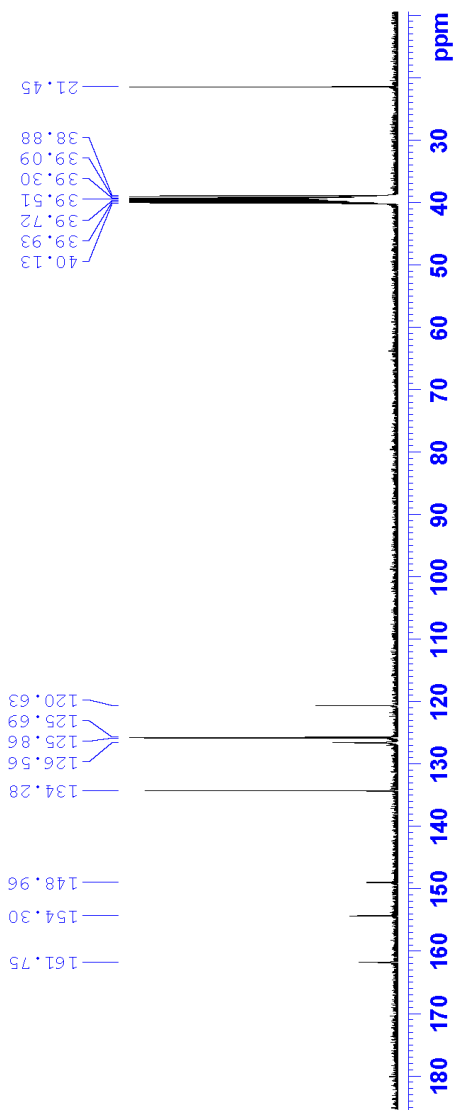



Fig. S25. <sup>1</sup>H NMR (400 MHz) spectrum of **10** in DMSO-d<sub>6</sub>

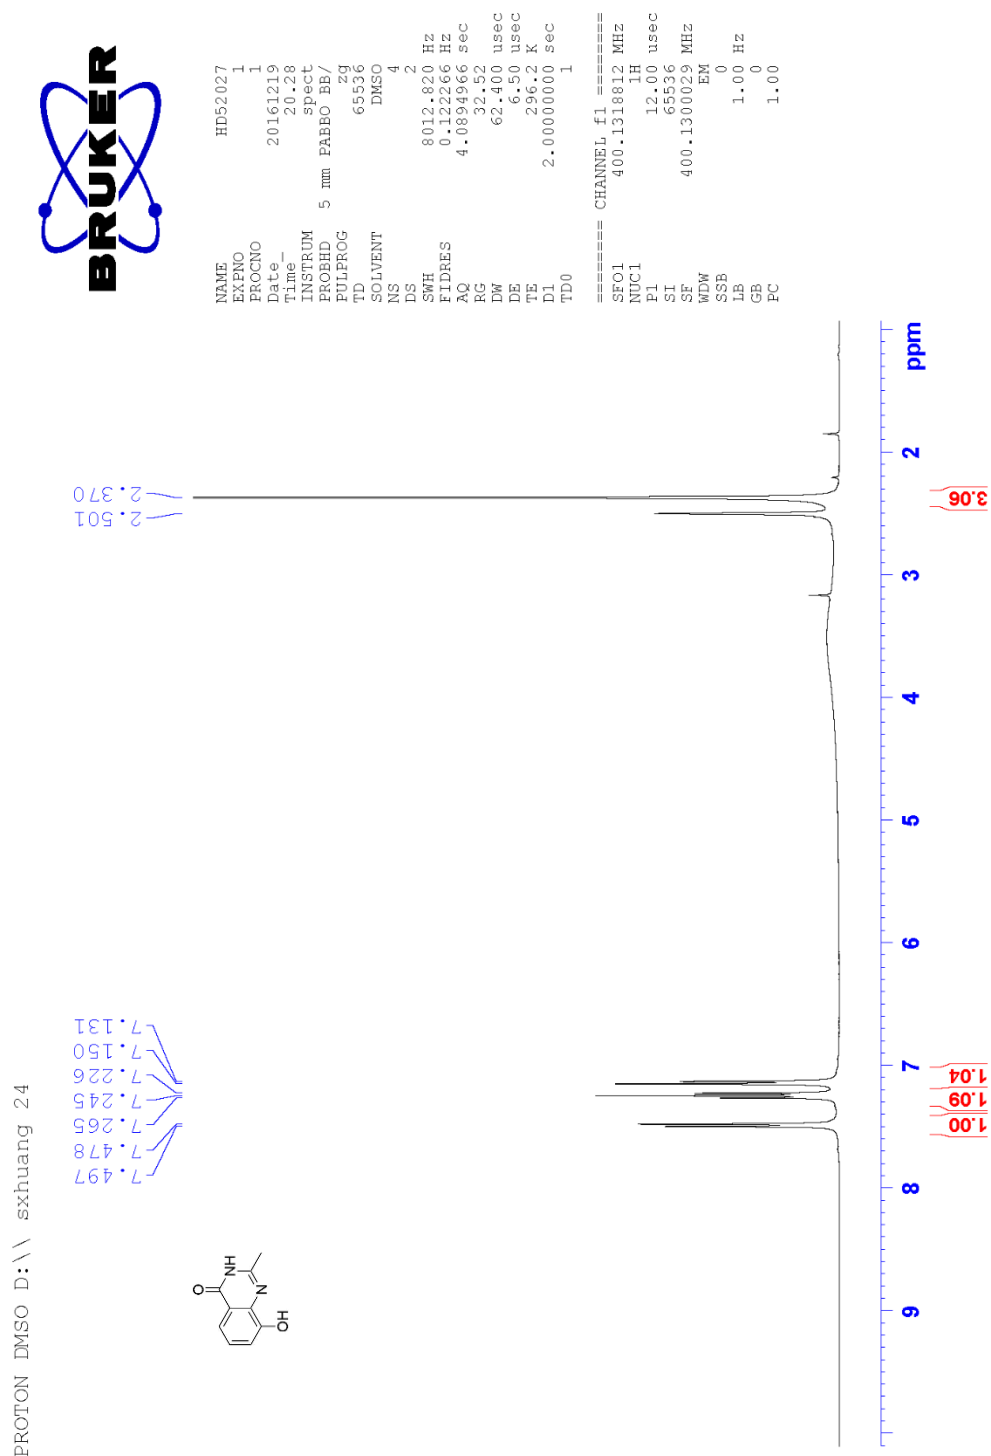

Fig. S26.  $^1\text{H}$  NMR (100 MHz) spectrum of **10** in  $\text{DMSO}-d_6$

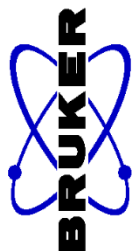

```

NAME HD52027
EXPNO 4
PROCNO 1
Date_ 20161219
Time_ 20.35
INSTRUM spect
PROBHD 5 mm PABBO
PULPROG zgpg30
TD 65536
SOLVENT DMSO
NS 59
DS 4
SWH 24038.461 Hz
FIDRES 0.366798 Hz
AQ 1.3631988 sec
RG 214.83
DW 20.800 usec
DE 6.50 usec
TE 296.2 K
D1 3.0000000 sec
D11 0.0300000 sec
TD0 1

===== CHANNEL f1 =====
SF01 100.6240376 MHz
NUC1 13C
P1 12.00 usec
SI 32768
SF 100.6128112 MHz
SSB 0
WDW EM
LB 1.00 Hz
GB 0
PC 1.40
    
```

c13 DMSO D:\ \ sxhuang 24

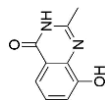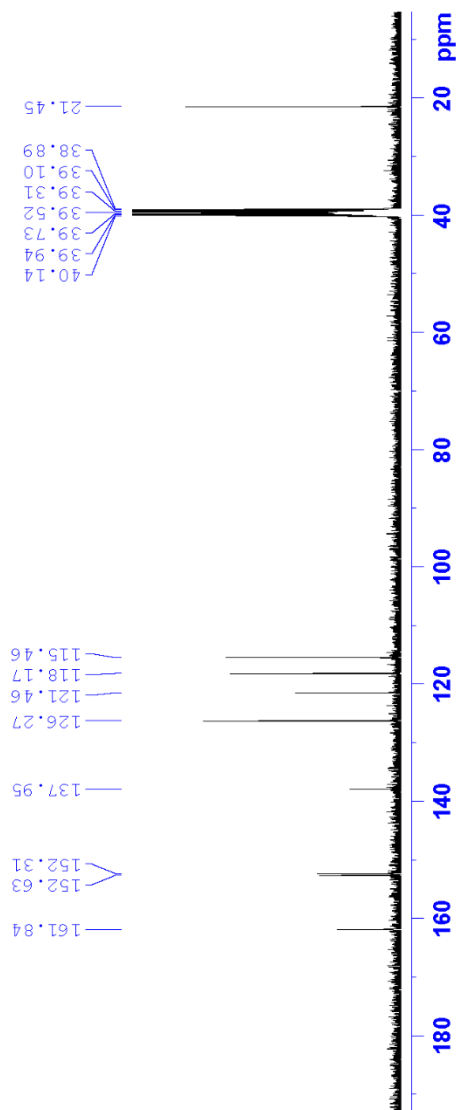

## Supplementary references

1. L. Li, Z. Xu, X. Xu, J. Wu, Y. Zhang, T. Zhang, X. He, T. Zabriskie and Z. Deng, The mildiomycin biosynthesis: initial steps for sequential generation of 5-hydroxymethylcytidine 5'-monophosphate and 5-hydroxymethylcytosine in *Streptovorticillium rimofaciens* ZJU5119. *ChemBioChem.*, 2008, **9**, 1286-1294.
2. M. S. B. Paget, L. Chamberlin, A. Atrih, S. J. Foster and M. J. Buttner, Evidence that the extracytoplasmic function sigma factor sigmaE is required for normal cell wall structure in *Streptomyces coelicolor* A3(2).1999, *J. Bacteriol.*, **181**, 204–211.
3. K. A. Datsenko and B. L. Wanner, One-step inactivation of chromosomal genes in *Escherichia coli* K-12 using PCR products. *Proc. Natl. Acad. Sci. U. S. A.*, 2000, **97**, 6640-6645.
4. T. Hosaka, M. Ohnishi-Kameyama, H. Muramatsu, K. Murakami, Y. Tsurumi, S. Kodani, M. Yoshida, A. Fujie and K. Ochi, Antibacterial discovery in actinomycetes strains with mutations in RNA polymerase or ribosomal protein S12. *Nat. Biotechnol.*, 2009, **27**, 462-464.
